# Supplementary material for: Cyclic Dipeptides: The Biological and Structural Landscape with Special Focus on the Anti-Cancer Proline-Based Scaffold
Source: MDPI journal article supplement (doi:10.3390/biom11101515), 2021-10-14
Supplement: s1 [file s1]

## **SUPPLEMENTARY MATERIALS**

### **Diketopiperazines: the biological and structural landscape with special focus on the anti-cancer proline-based DKP scaffold**

Joanna Bojarska,\* Adam Mieczkowski, Zyta Ziora, Mariusz Skwarczynski, Istvan Toth, Ahmed O. Shalash, Keykavous Parang, Shaima A. El-Mowafi, Eman H. M. Mohammed, Sherif Elnagdy, Maha AlKhazindar, Wojciech M. Wolf

\* Correspondence: joanna.bojarska@p.lodz.pl

## The overview of the structural databases.

### *The Research Collaboratory for Structural Bioinformatics Protein Data Bank*

The survey of the Research Collaboratory for Structural Bioinformatics Protein Data Bank (RCSB PDB) revealed 42 bio-complexes related to DKP moiety, including proline-based one, signed by reference codes: 6SSG, 6SSF, 6SSE, 6SSD, 6F0B, 6F0C, 41CT, 41Q7, 41PS, 41PW, 41Q9, 5YL4, 6EZ3, 5MLQ, 5OCD, 5MLP, 4Q24, 4E0T, 4E0U, 3S7T, 3OQJ, 3OQH, 3OQI, 3OQ, 3NC6, 3NC7, 3NC3, 3NC5, 3N1A, 2X9Q, 3G5H, 3G5F, 1W1T, 1W1P, 1W1V, 1W1Y, 6VXV, 6VZB, 6WOS, 6VZA, 1O6I, 7OW9, 6VZB, 6VXV, 6VZA. Interestingly, only one complex, 1QZR, contains 2,6-DKP core.

### *The Cambridge Structure Database*

That notwithstanding, overview of the Cambridge Structure Database (CSD) to 531 (1070 without restrictions\*) entries of 2,5-DKPs, 29 (43 without restrictions\*) 2,3-DKPs and 37 (56 without restrictions\*) hits of 2,6-DKPs. It is noteworthy that CSD collects a huge structural knowledge on potential peptide-based ligands that can be applicable at the macromolecular level. Small-molecular crystal structures, especially peptides and their derivatives, have a natural synergy with proteins. The rational design of modern effective ligands should be based not only on the 3D-structure of macromolecular target but also on potential ligands.

*\*restrictions: non-disordered, no errors, not polymeric, only simple crystal structures, only organics*

**Table S1.** Selected proline-based DKPs and their derivatives retrieved from the CSD (ver. May 2021).

|                                                                                     |                                                                                     |                                                                                       |
|-------------------------------------------------------------------------------------|-------------------------------------------------------------------------------------|---------------------------------------------------------------------------------------|
|  |  |  |
|-------------------------------------------------------------------------------------|-------------------------------------------------------------------------------------|---------------------------------------------------------------------------------------|

AKUWUY

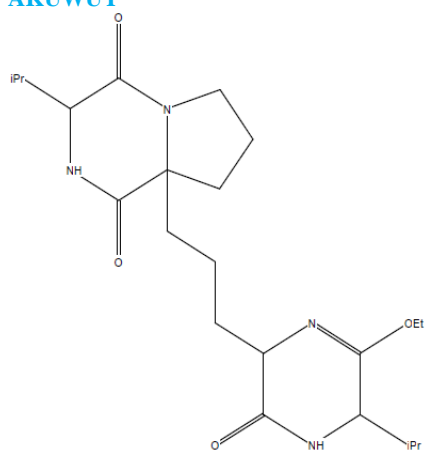

RUCDAW

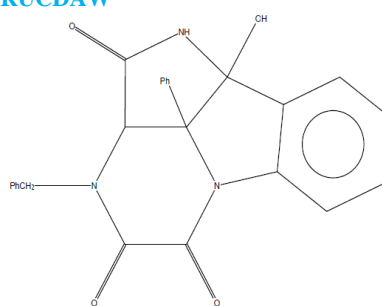

YIPRUK

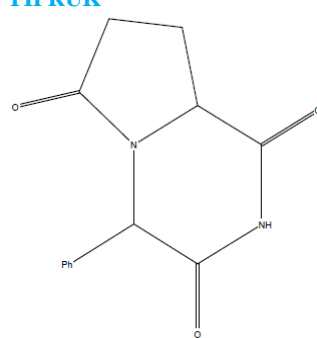

APUHOJ

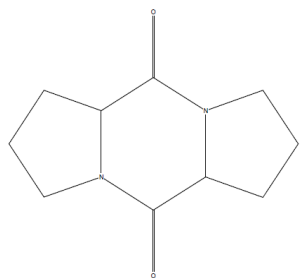

BAMCEZ

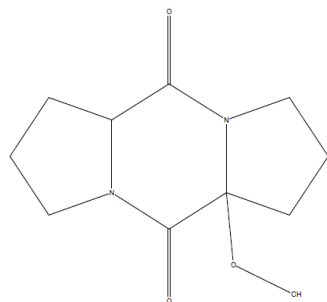

BIBKAA

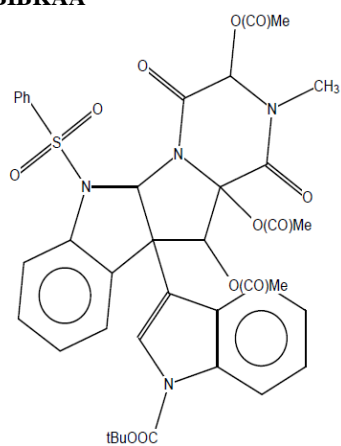

BIDDOJ

|                                                                                                                                                                                                                                                                                                                                                                         |  |  |
|-------------------------------------------------------------------------------------------------------------------------------------------------------------------------------------------------------------------------------------------------------------------------------------------------------------------------------------------------------------------------|--|--|
| 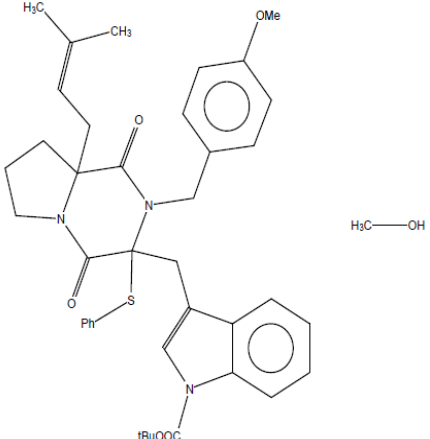 <p>Chemical structure of a complex molecule featuring a pyrrolidine ring, a thioether, a benzothiazine system, and a 4-methoxyphenyl group. A side chain includes a vinyl group and a tert-butyl ester. A small molecule <math>\text{H}_3\text{C}-\text{OH}</math> is also shown.</p> |  |  |
| <p><b>BONROL</b></p>                                                                                                                                                                                                                                                                   |  |  |
| <p><b>BOLWEE</b></p>                                                                                                                                                                                                                                                                 |  |  |
| <p><b>CAETOC</b></p>                                                                                                                                                                                                                                                                 |  |  |
| <p><b>CEWBUE</b></p>                                                                                                                                                                                                                                                                                                                                                    |  |  |

|                                                                                                            |  |  |
|------------------------------------------------------------------------------------------------------------|--|--|
| 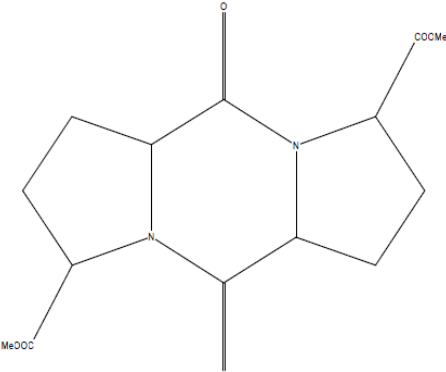                          |  |  |
| <p><b>CITXAE</b></p>      |  |  |
| <p><b>CLPRAL01</b></p>   |  |  |
| <p><b>CLPRPR01</b></p>  |  |  |
| <p><b>COCYEZ</b></p>                                                                                       |  |  |

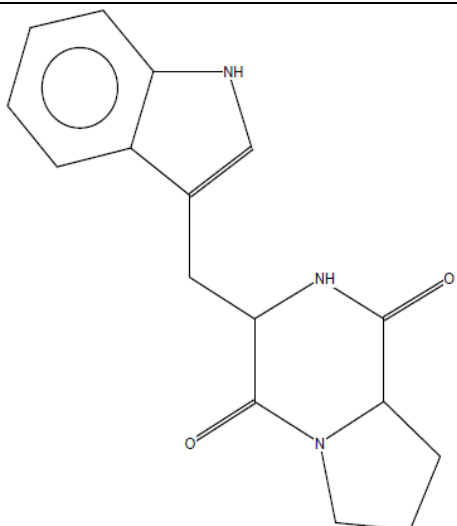

COSGEX

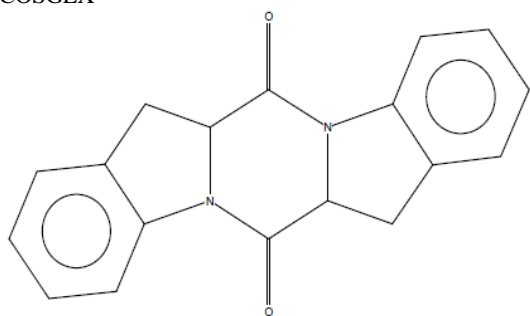

COYJIJ01

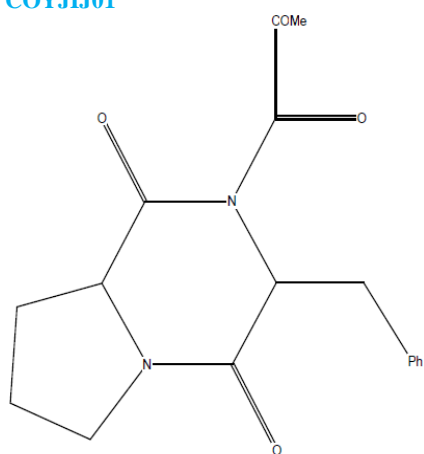

CUWPER

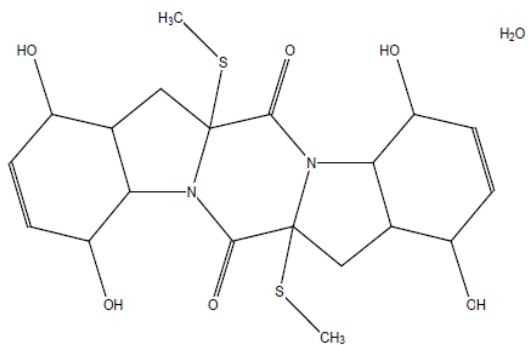

CYPAPR11

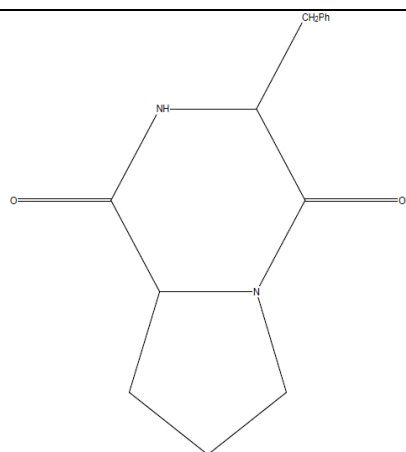

CYPRIE

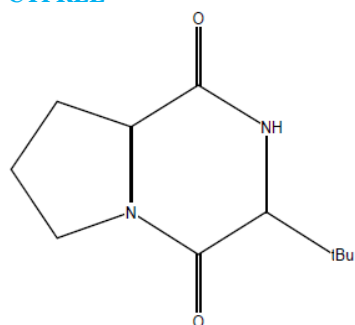

DAGPAE

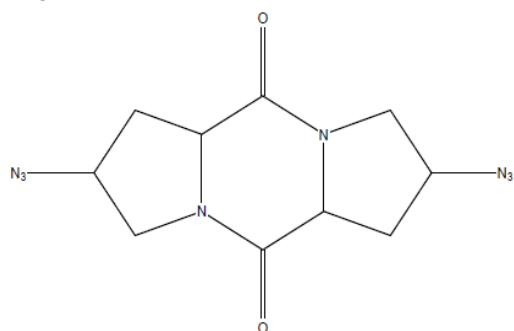

DARVID

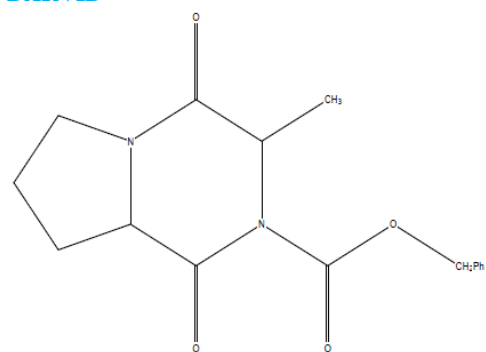

DARVOJ

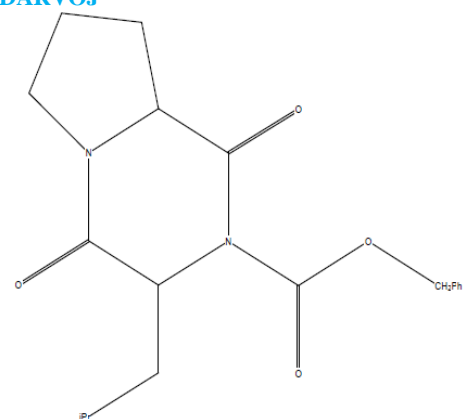

DIGPEO

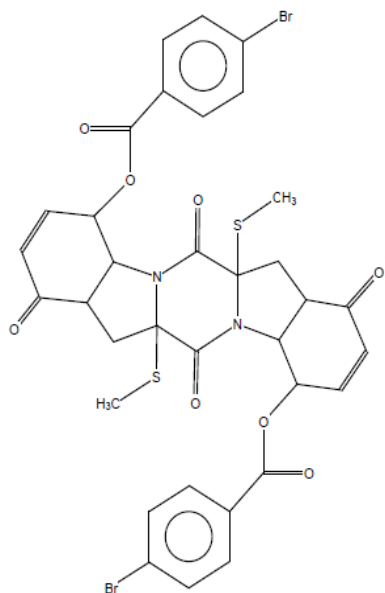

**DITGIZ**

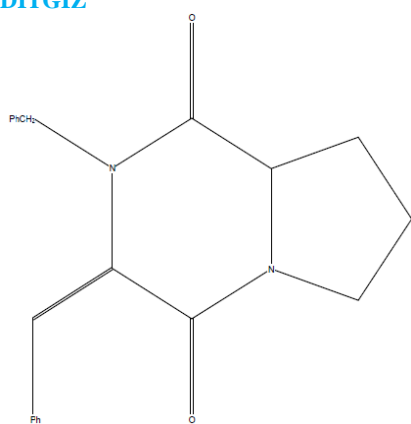

**DUNVIS**

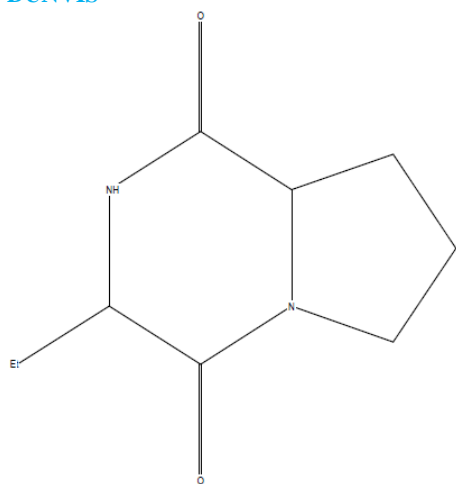

**EBIFAZ**

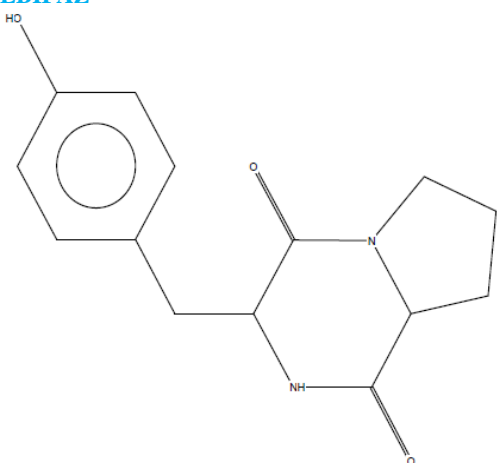



EJADUP

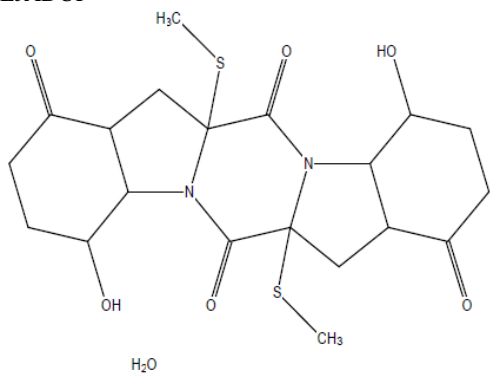

EJADOJ

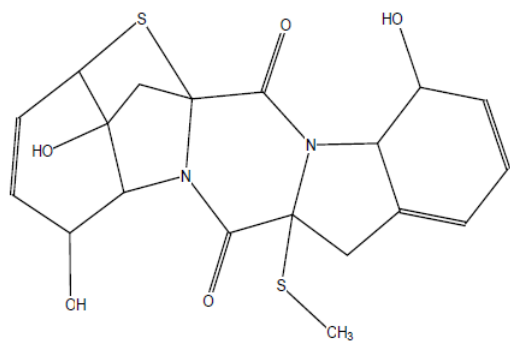

EPICZA

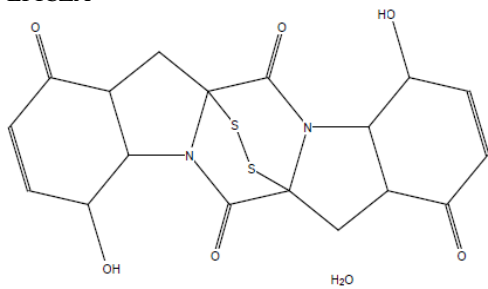

EXURAQ

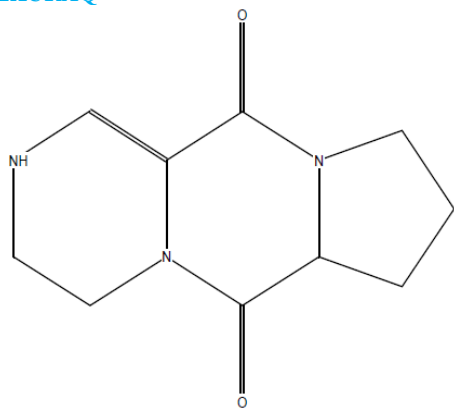

FEMWAV

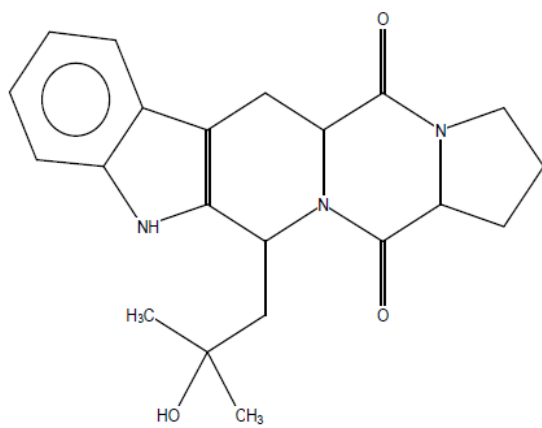

FEXXAH

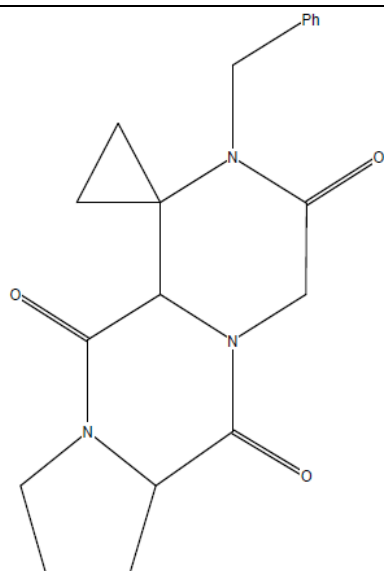

FIFGAC01

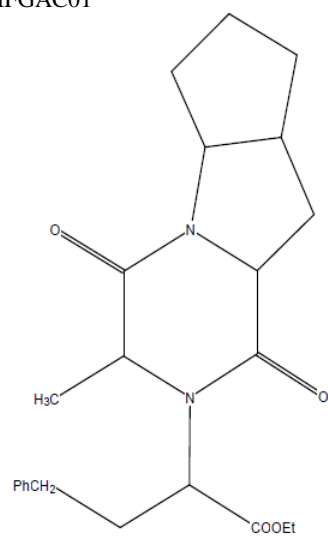

FODNES

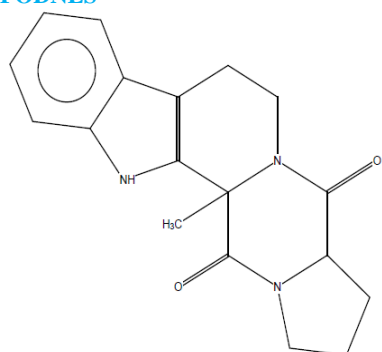

FODNOC

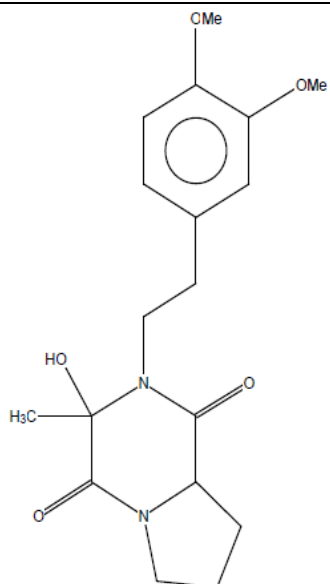

FODNUI

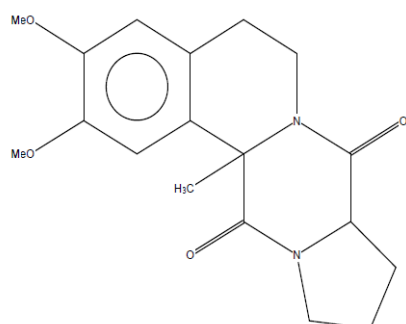

GESYAH

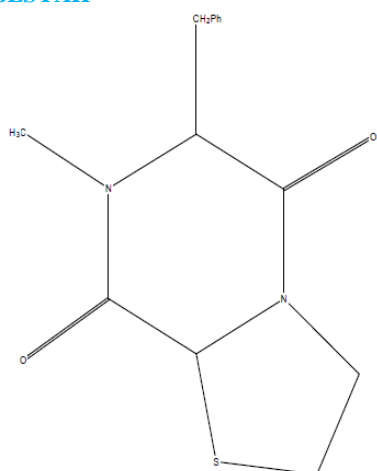

GESYEL

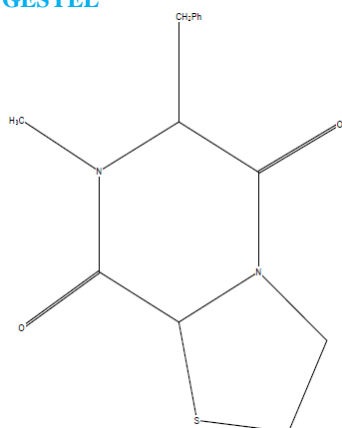

GESYIP

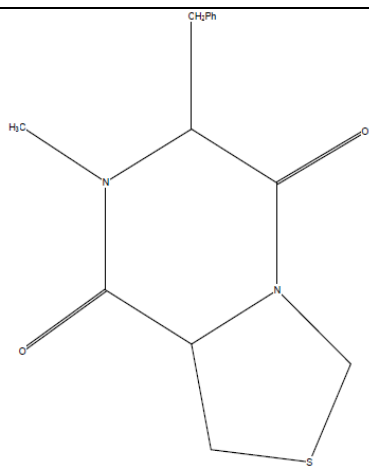

GESYOV

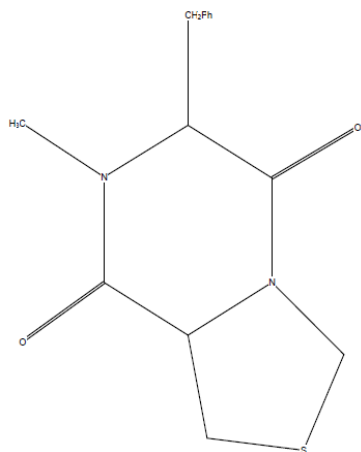

GLHPRD

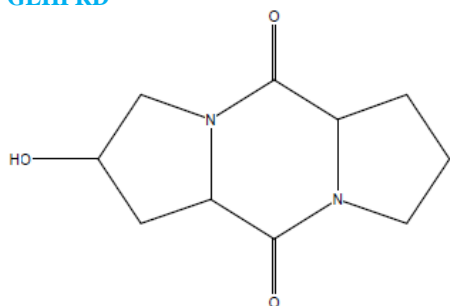

GUGXOW

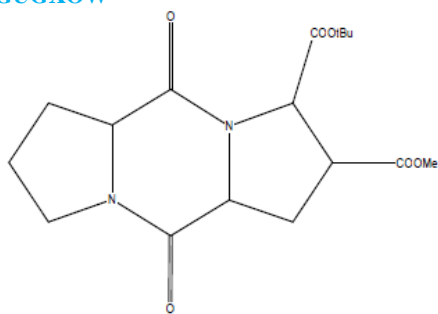

HAMPAP

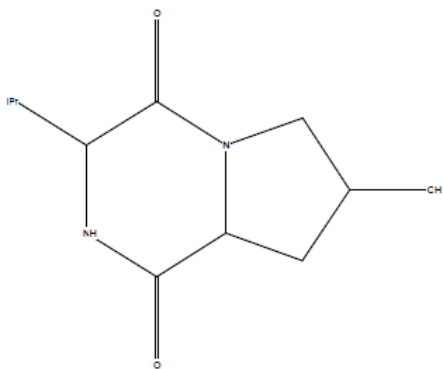

HANJIR

|                                                                                                                                                                                                           |  |  |
|-----------------------------------------------------------------------------------------------------------------------------------------------------------------------------------------------------------|--|--|
| 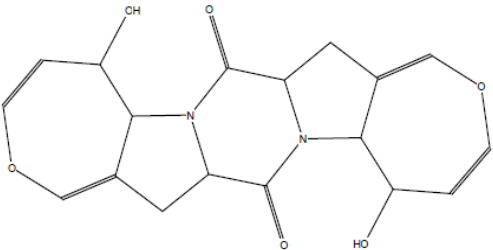                                                                                                                         |  |  |
| <p>HANJOX</p>                                                                                                             |  |  |
| <p>HANJUD</p>  <p>H<sub>2</sub>O</p>  |  |  |
| <p>HMTKIN</p>                                                                                                          |  |  |
| <p>HOYDAB</p>  <p>H<sub>3</sub>C—CCMe</p>                                                                              |  |  |
| <p>HURCAA</p>                                                                                                                                                                                             |  |  |

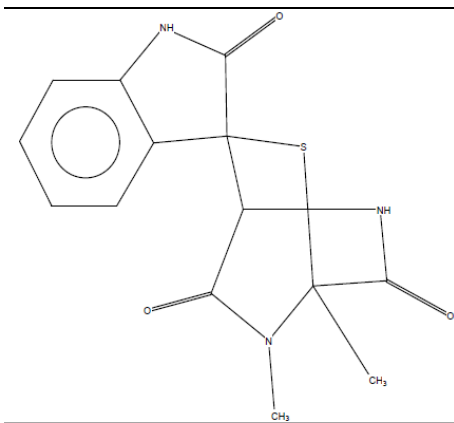

IGAKOT

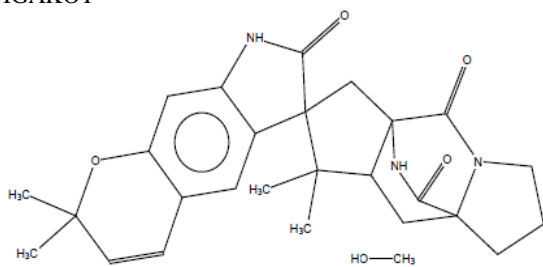

IGODEP

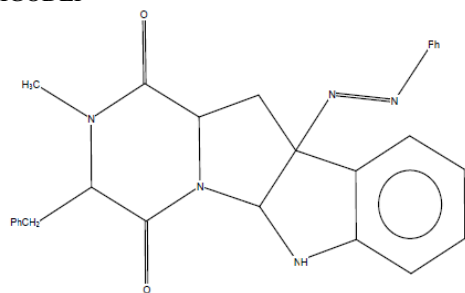

IMIHAP

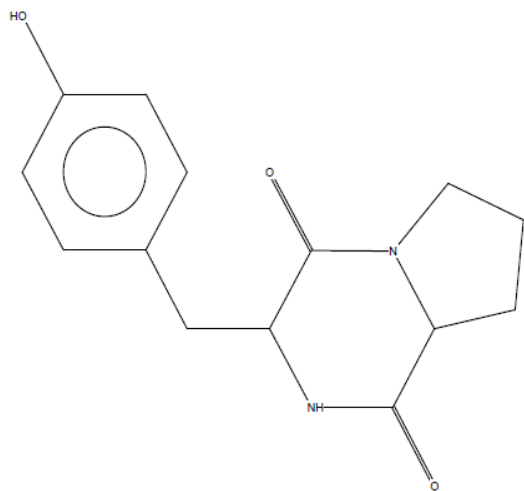

IPIJUO

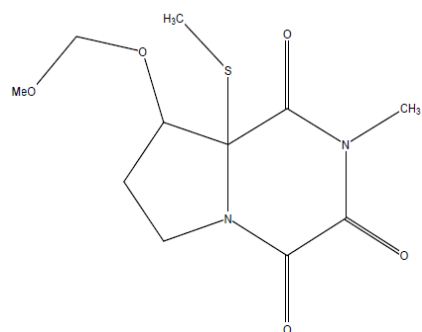

IPIKAV

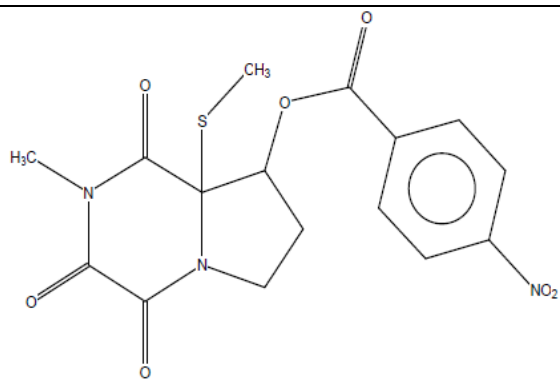

IQUNIT

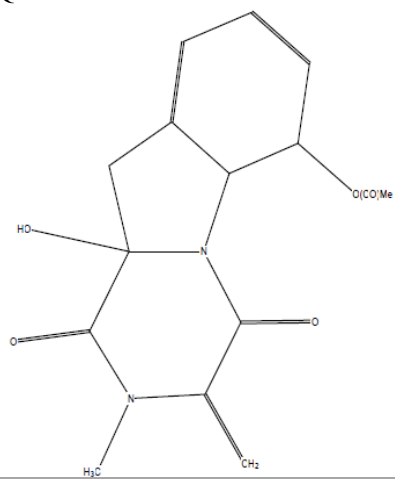

ISUTIA

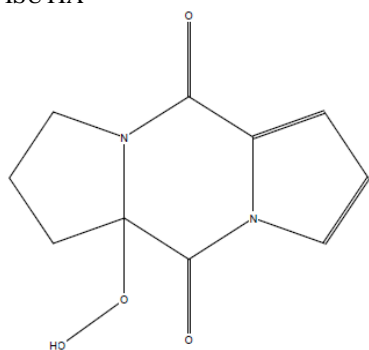

ISUTOG

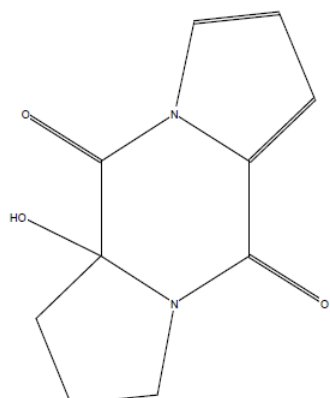

JAFFEC

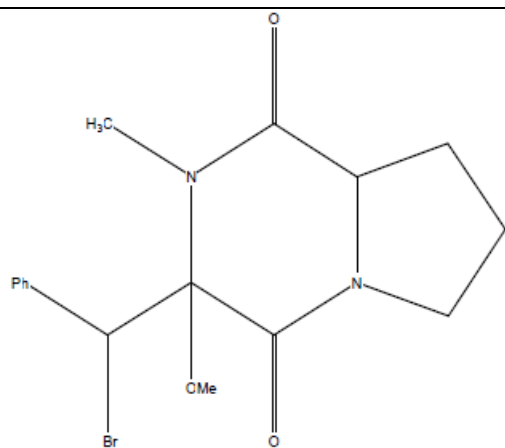

JEHPUH

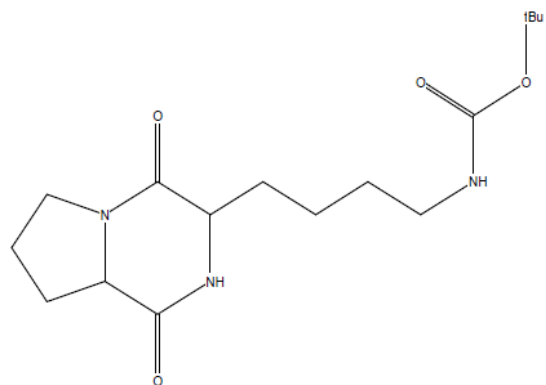

JIFNER

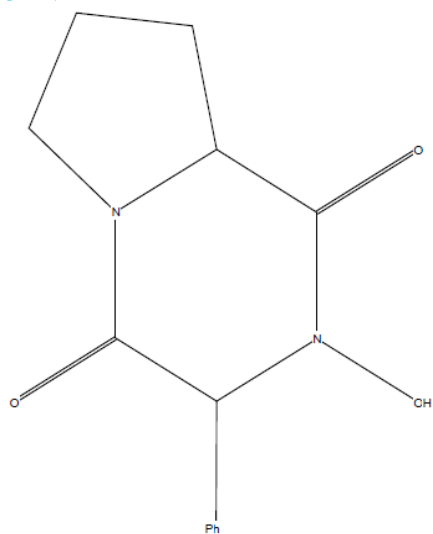

JUCSAB01

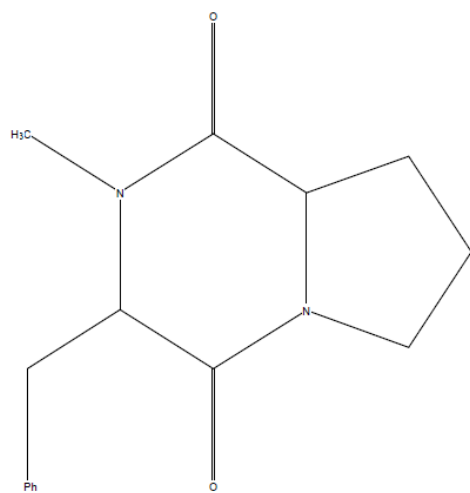

KAQGIU01



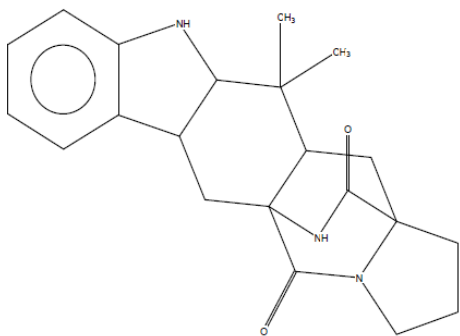

KAQWOQ

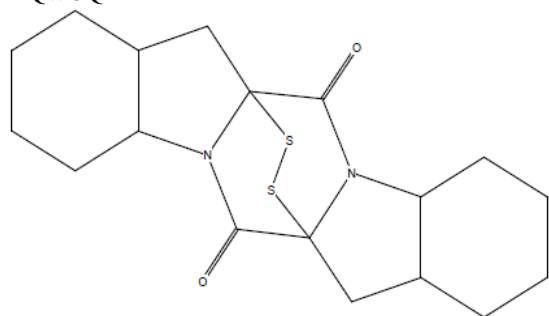

KAQXAD

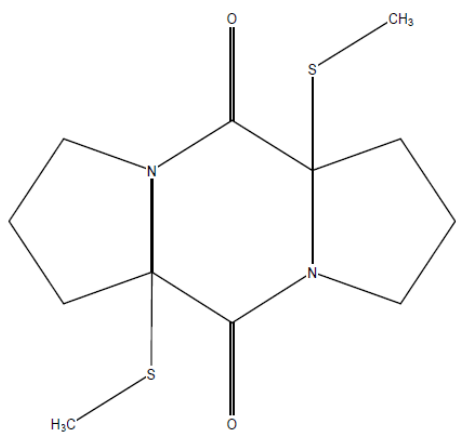

KASJAR

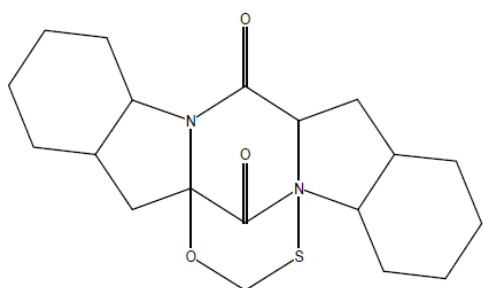

KETMIG01

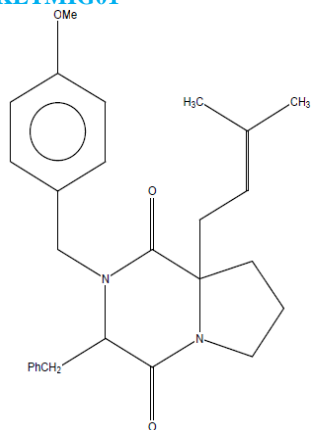

KINLUO

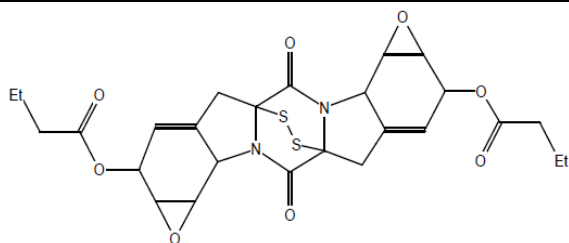

KUSXIF

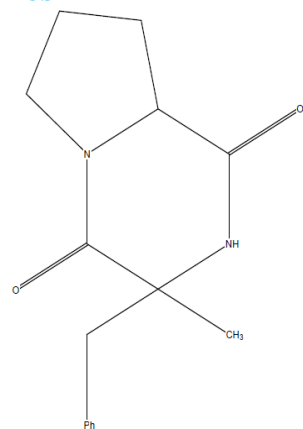

KUXJES

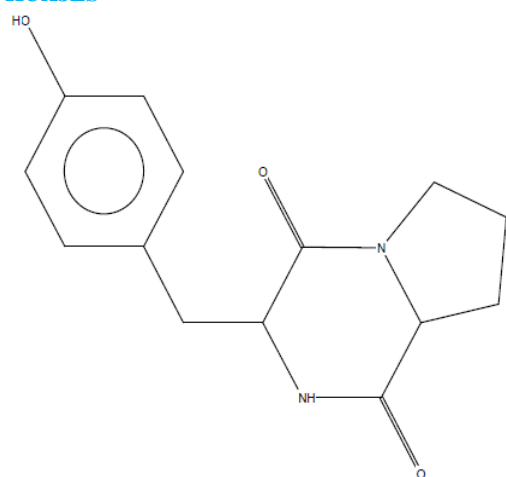

LEHREW

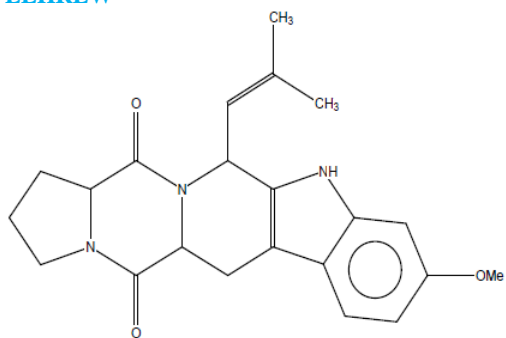

LIHHUH

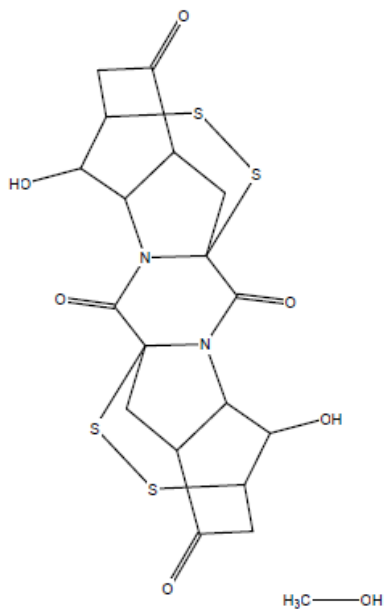

LIHJAP

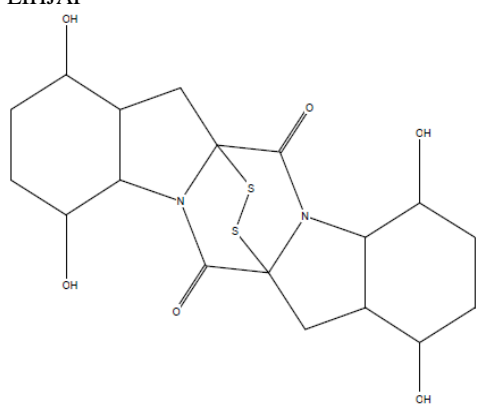

LIKNUO

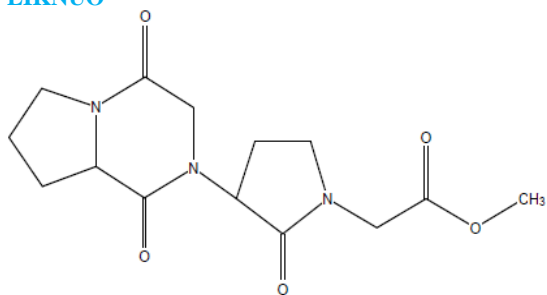

LIMMUR

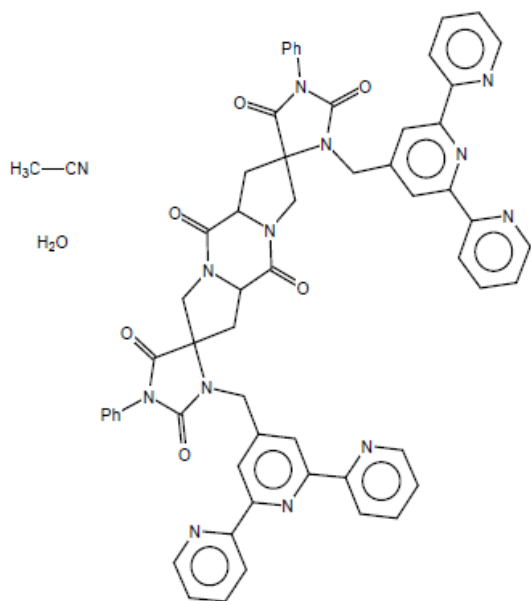

LPROGL

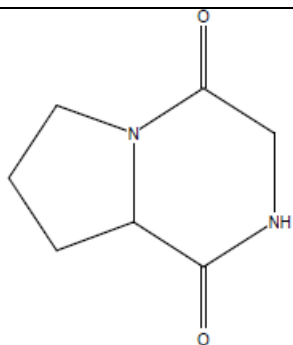

MBTZCU

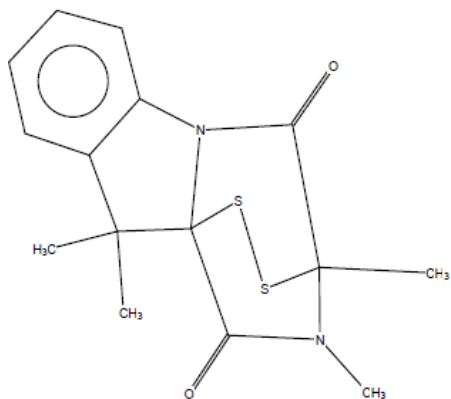

MEMWUZ

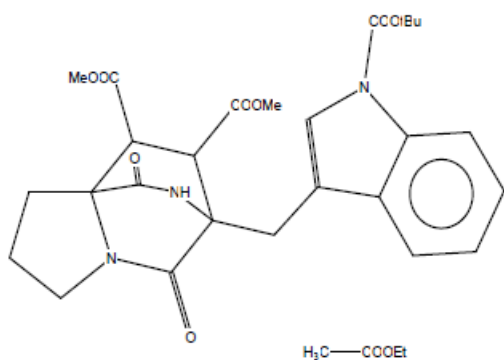

MKMPIN

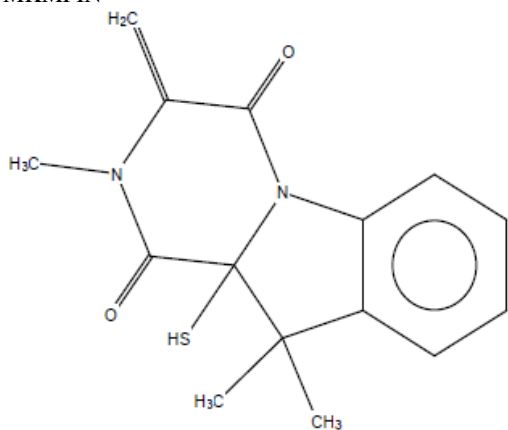

MIRFAU

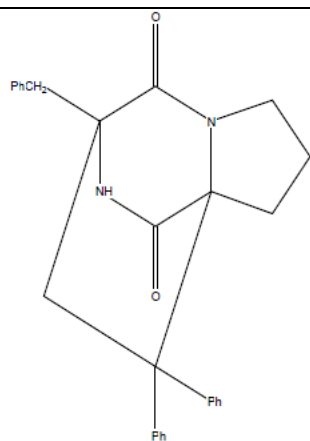

MIRFEY

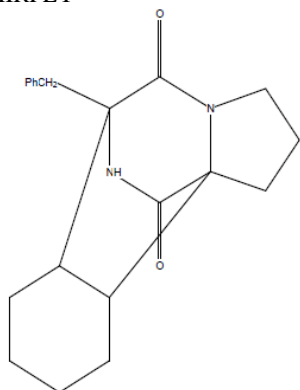

MOPQUF

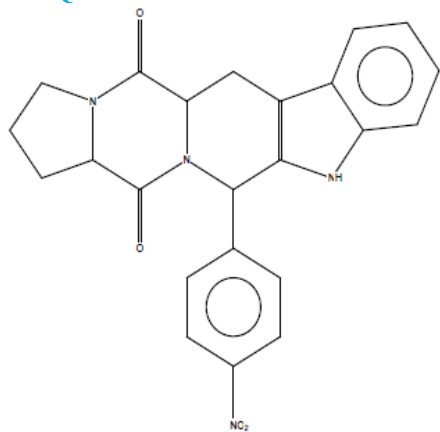

MURSID

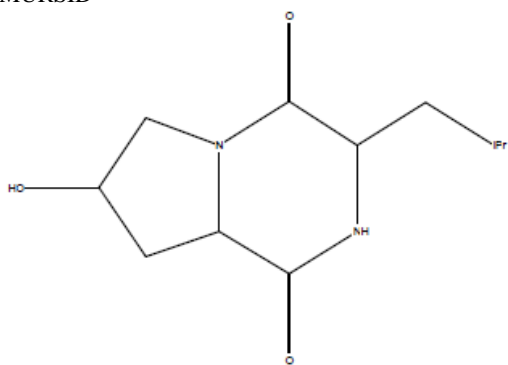

MUSTUQ01

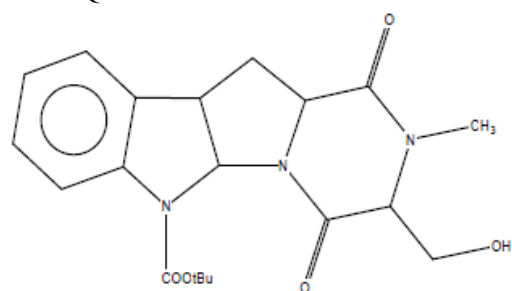

NAHPUJ

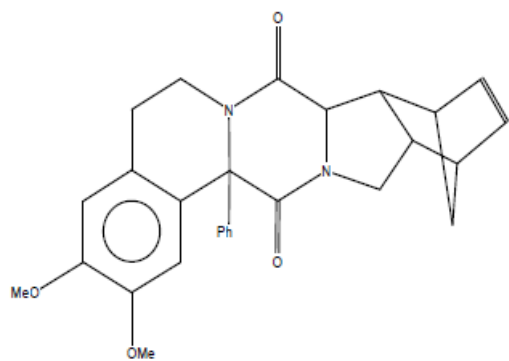

NELFES

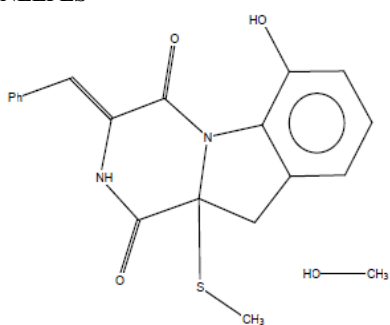

NEYLIP

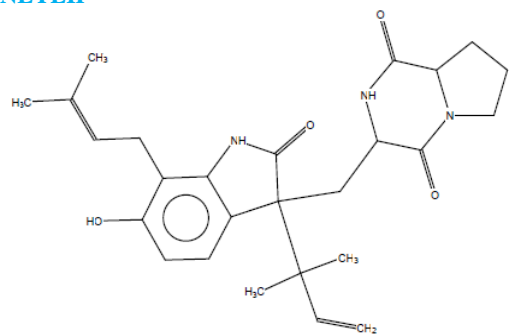

NIVJIM

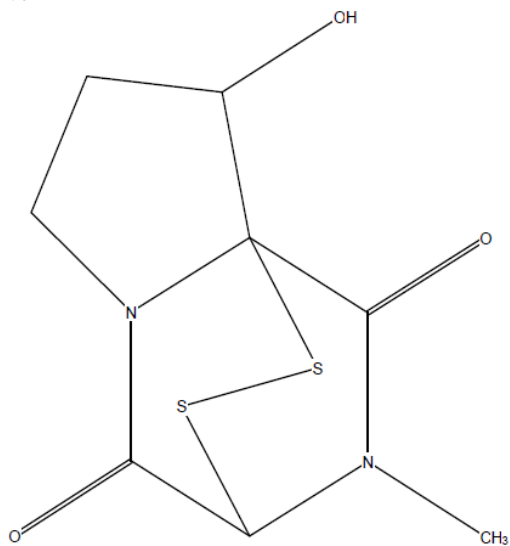

NOVCIK

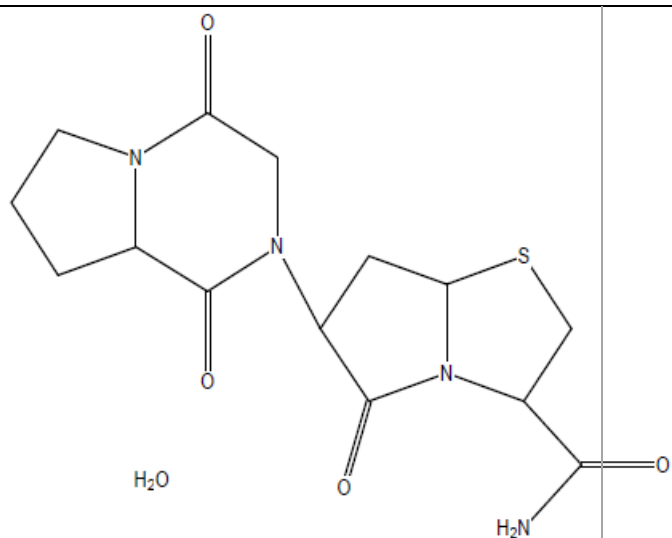

NUKFAD

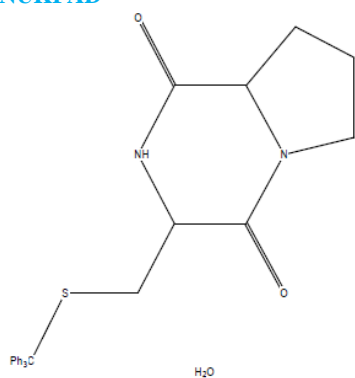

ODALUD

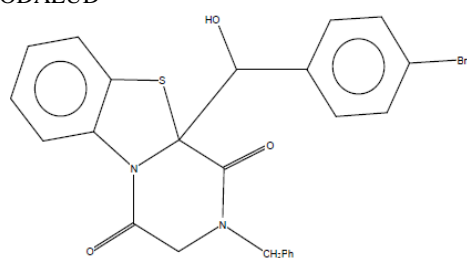

ODIQUN

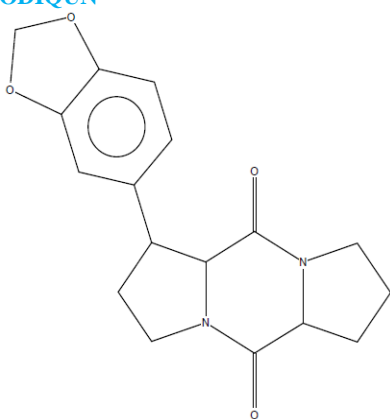

OJECIR

|                                                                                                                        |  |  |
|------------------------------------------------------------------------------------------------------------------------|--|--|
| 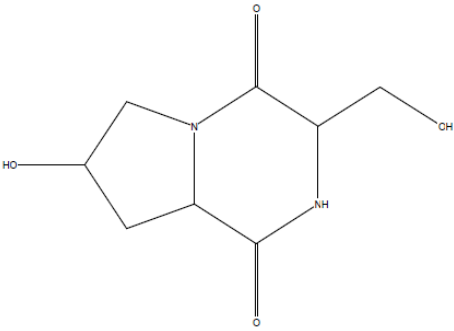                                       |  |  |
| <p>OSULEU</p>                         |  |  |
| <p>PABRAM</p>                        |  |  |
| <p>PALLU</p>  <p>H<sub>2</sub>O</p> |  |  |
| <p>PESYUK01</p>                     |  |  |
| <p>PUTQOM</p>                       |  |  |
| <p>PUYNUS</p>                                                                                                          |  |  |



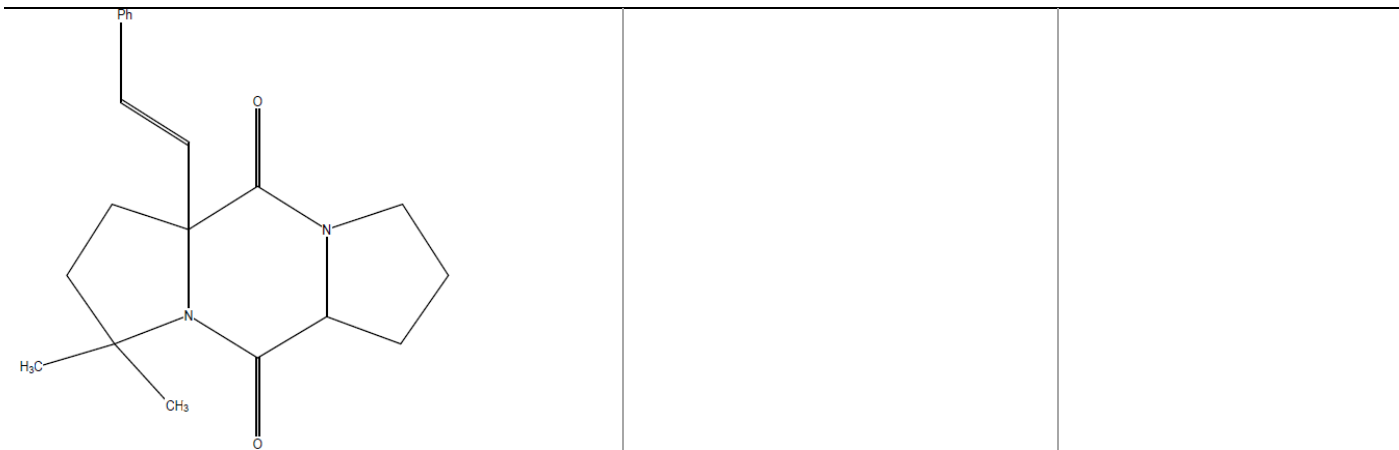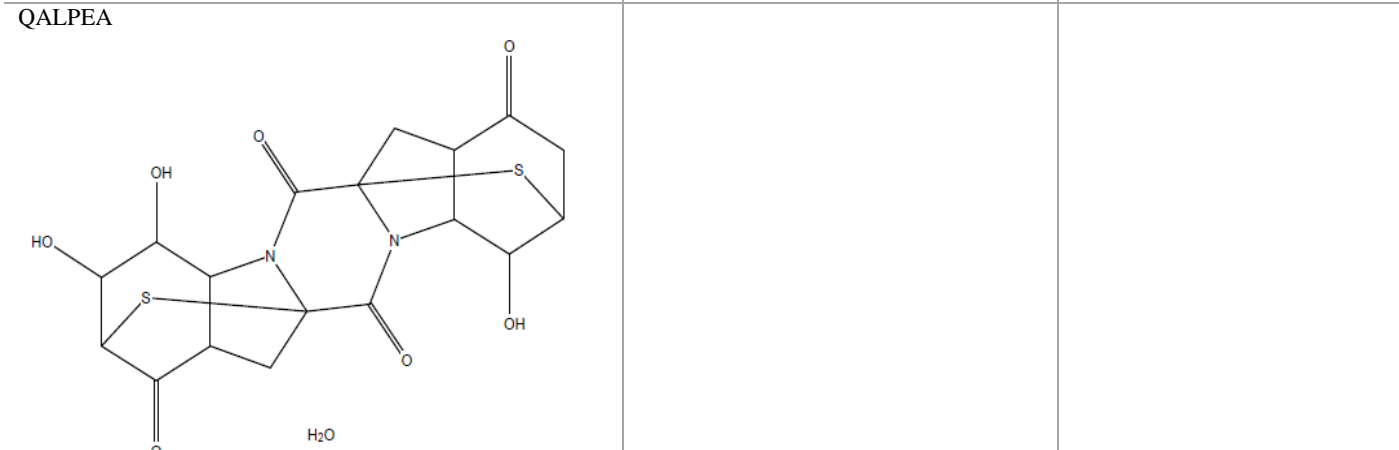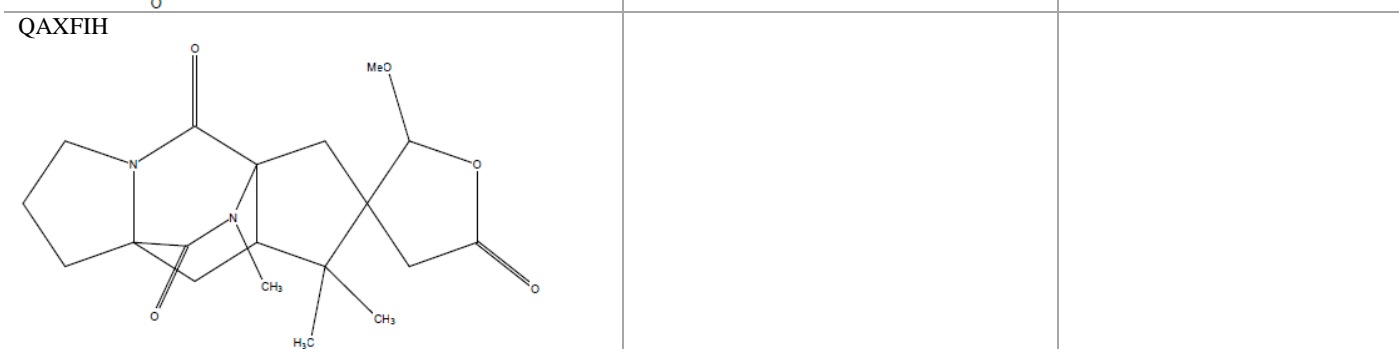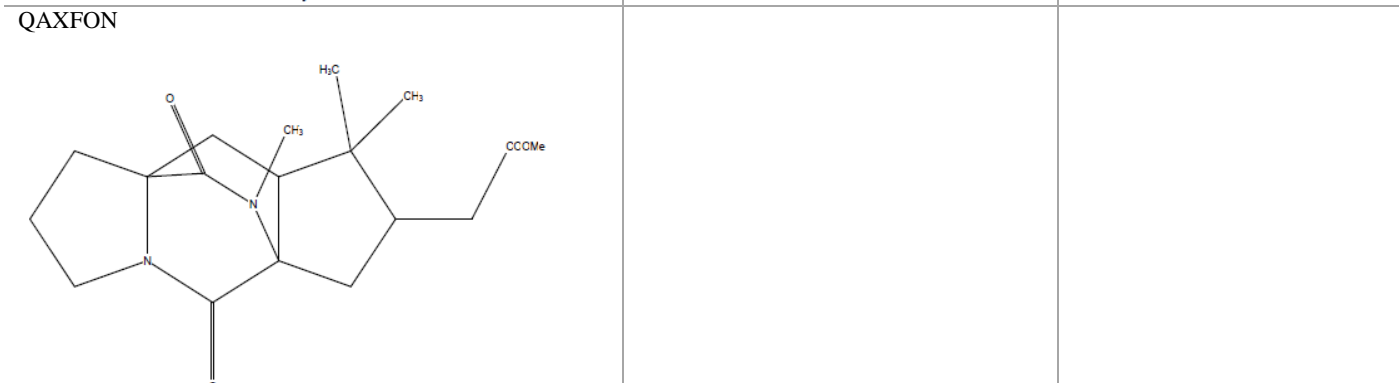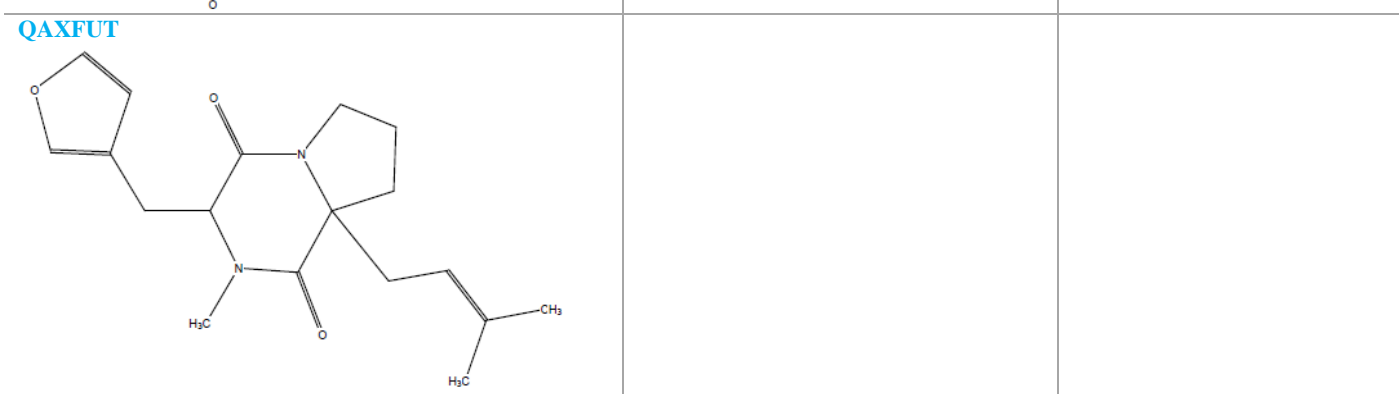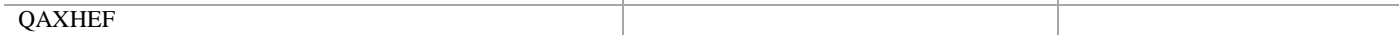

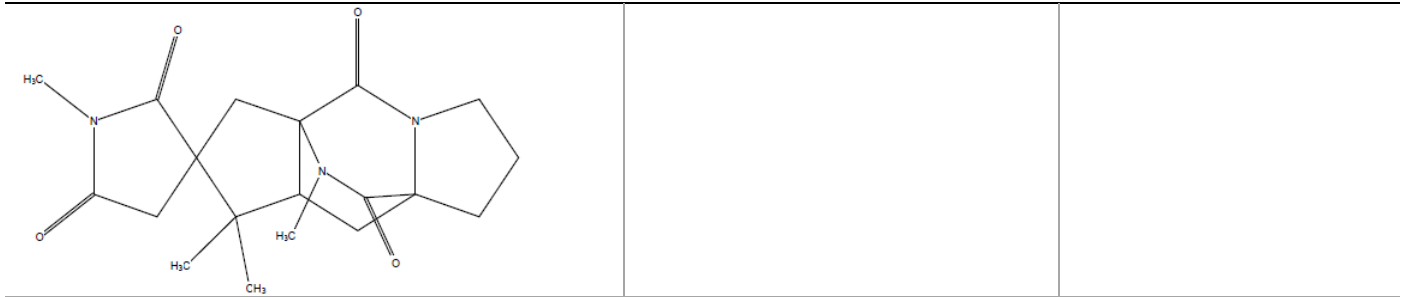

QELMID

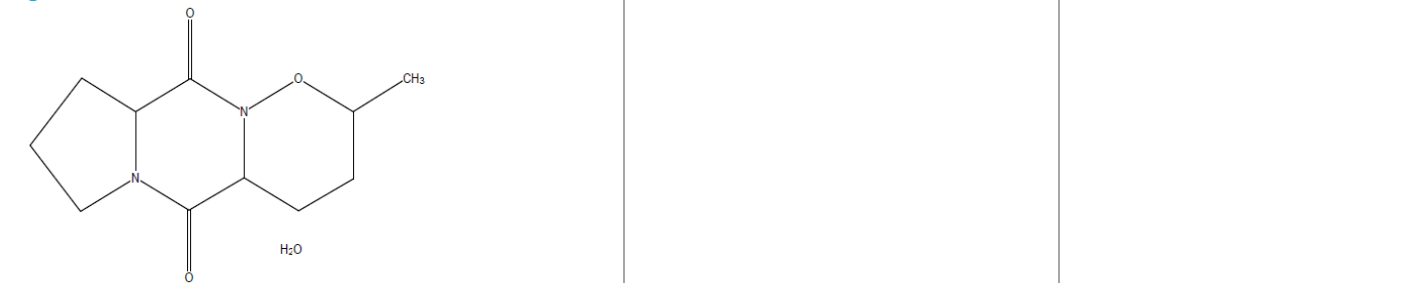

QIBHAM

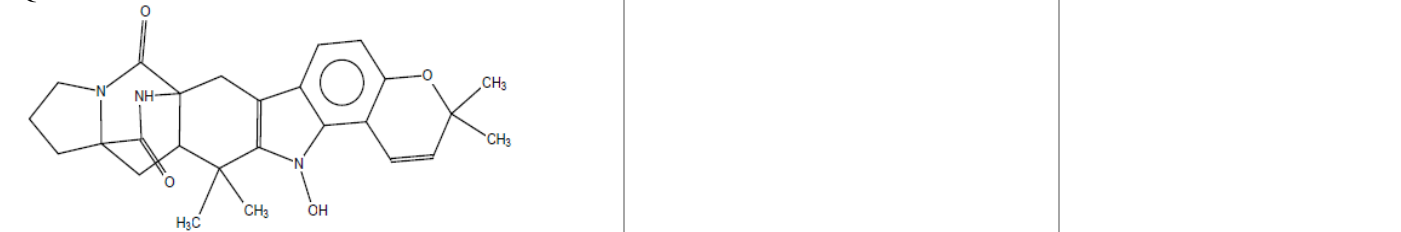

QOJXIY

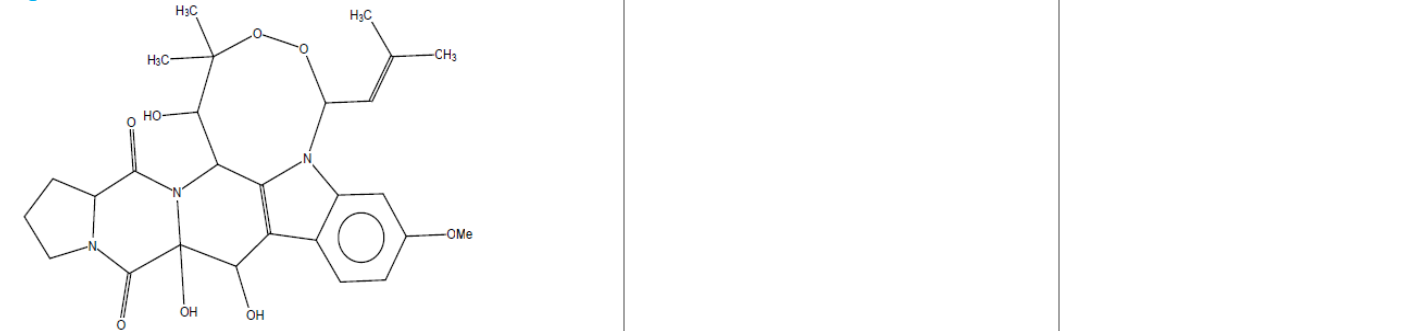

REFYIK

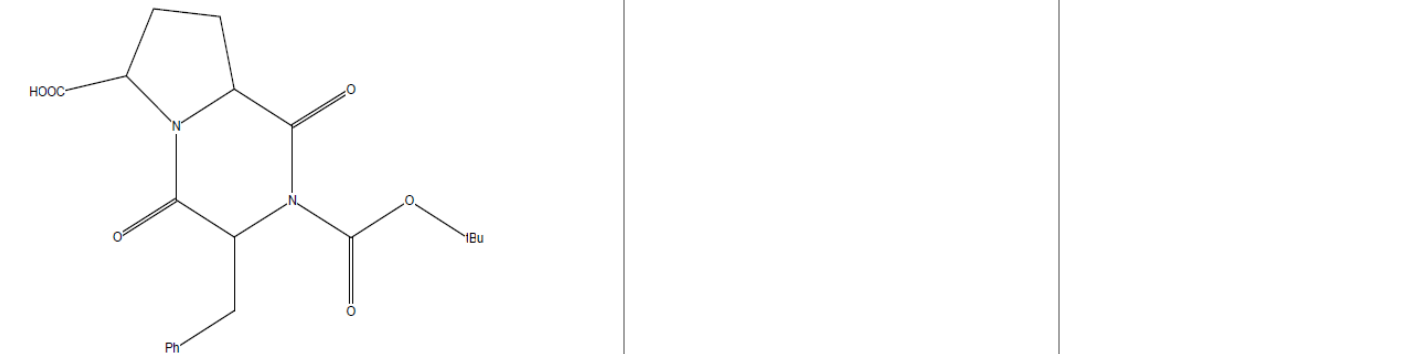

RELNUU

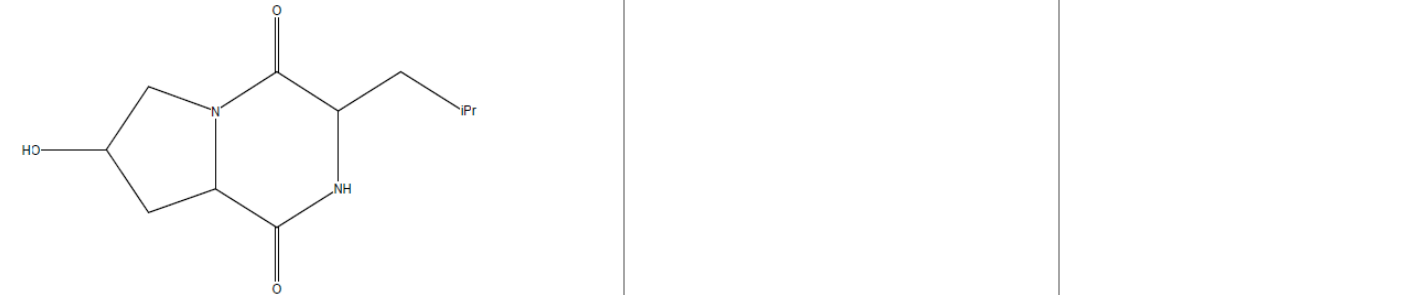

REQLEF

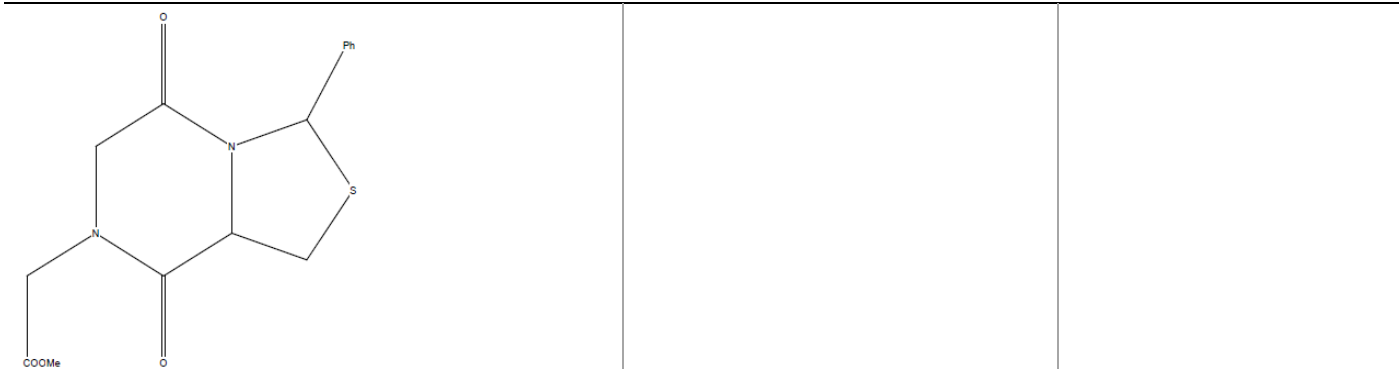

REVVIEW01

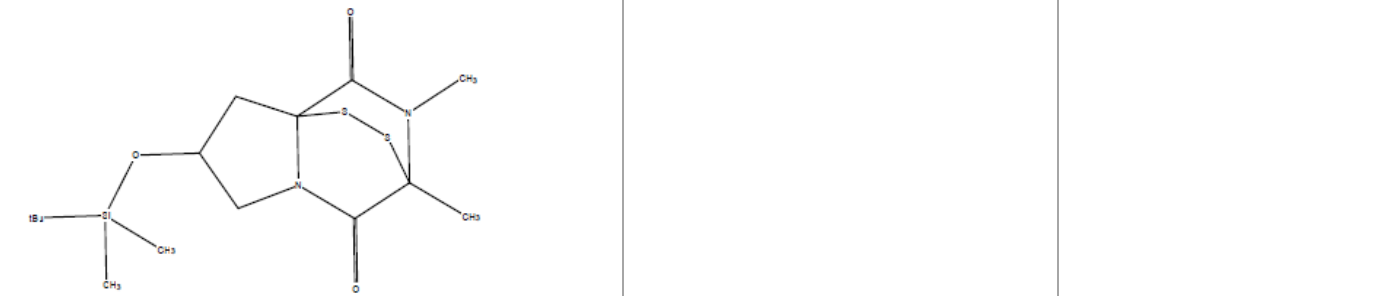

RIMTUE

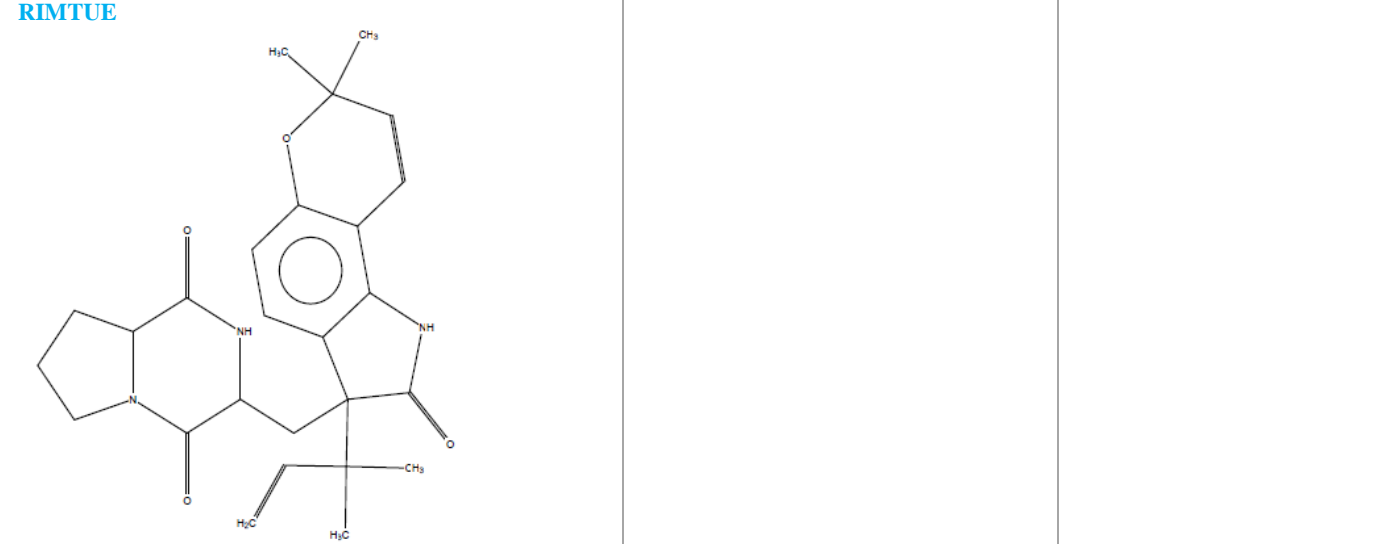

RISDIH

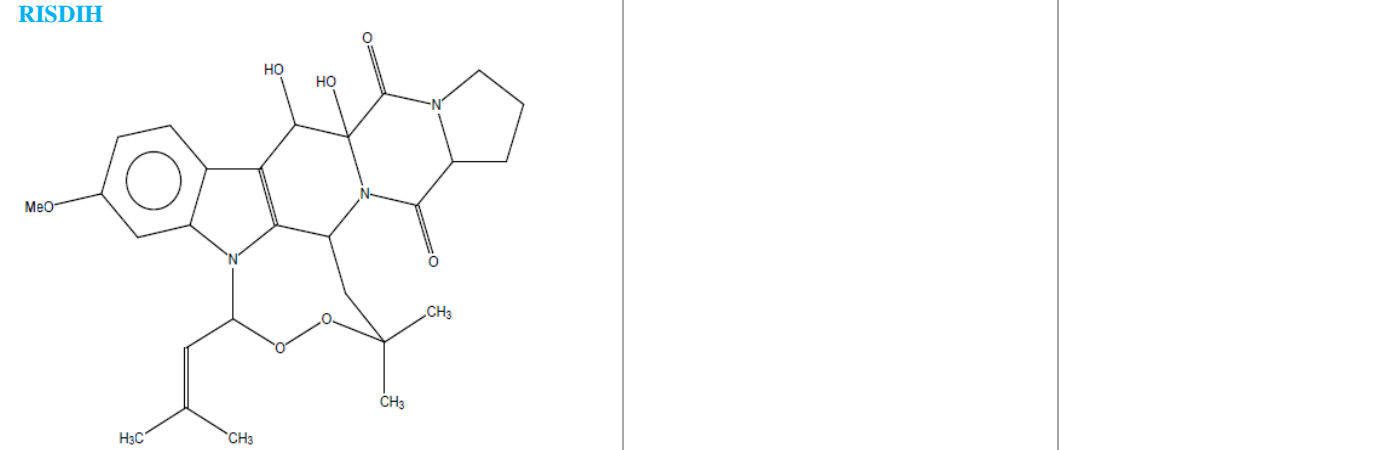

RIXSIG

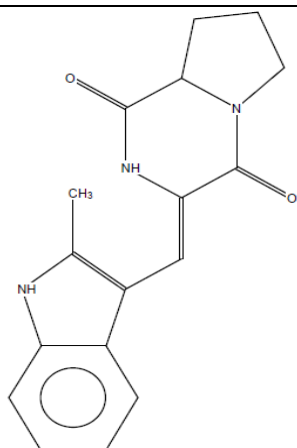

RONJIQ

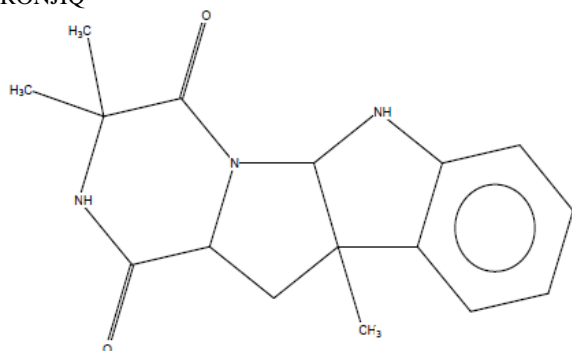

RONJOW

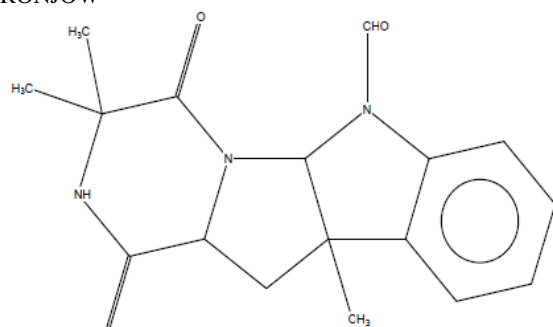

ROPVOH

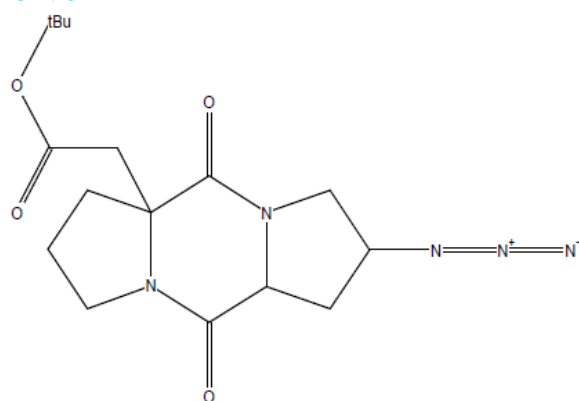

SEDROL

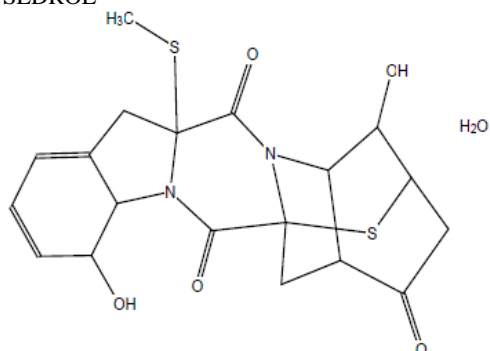

SEDSAY

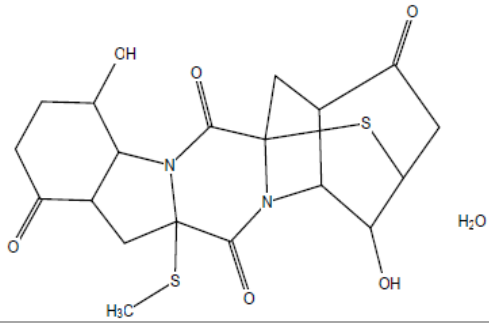

SEDSIG

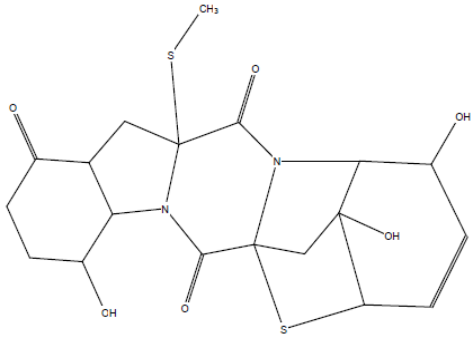

SEPFau

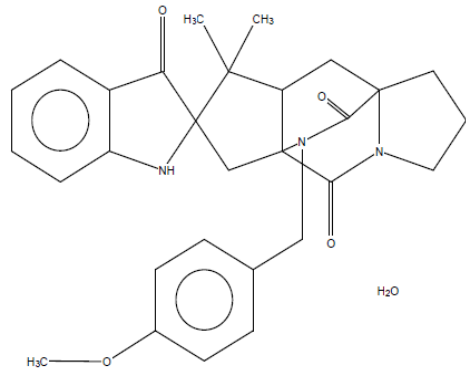

SEPFIC

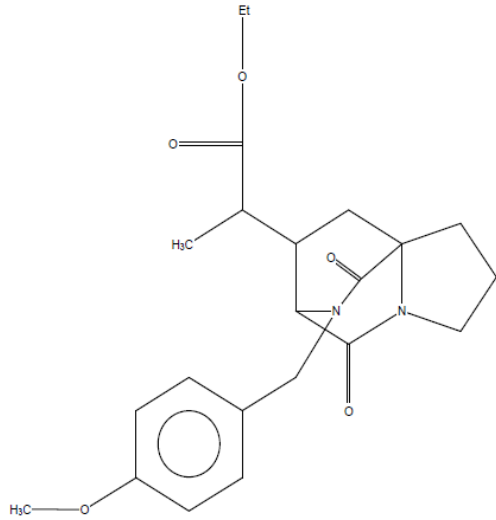

SEPF01

|                                                                                                   |  |  |
|---------------------------------------------------------------------------------------------------|--|--|
| 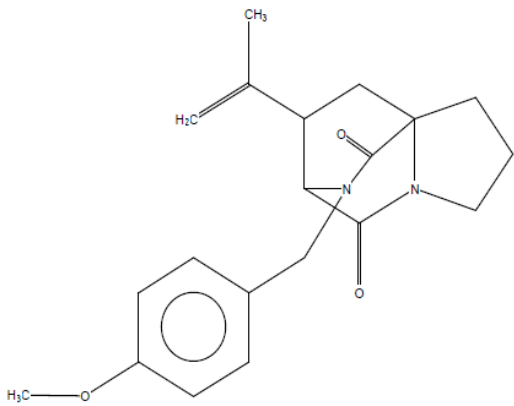                  |  |  |
| <p>SIRPLA</p>    |  |  |
| <p>SUGWUM</p>    |  |  |
| <p>TAYJOU</p>  |  |  |
| <p>TIBCI</p>   |  |  |
| <p>TIMHUT</p>                                                                                     |  |  |

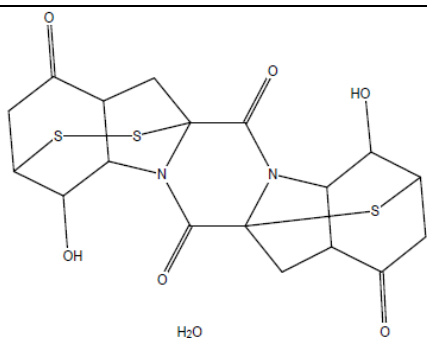

TOJQEQ

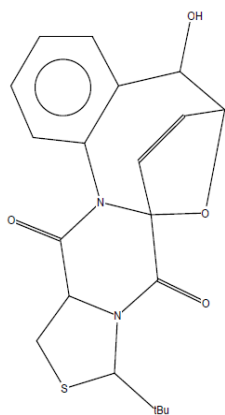

TOJQIU

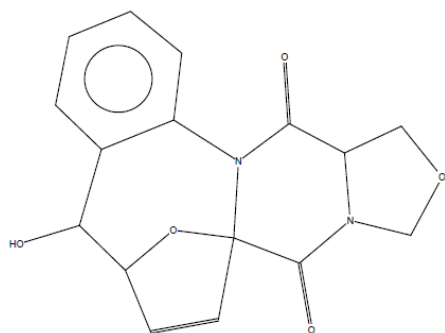

TOJQOA

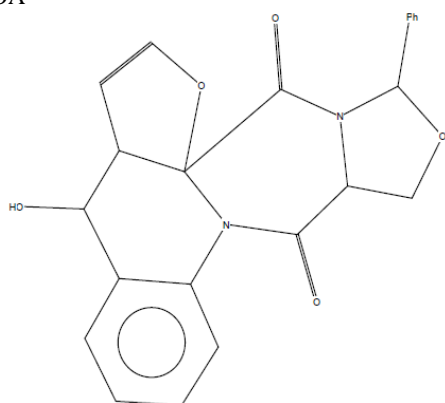

TOJQUG

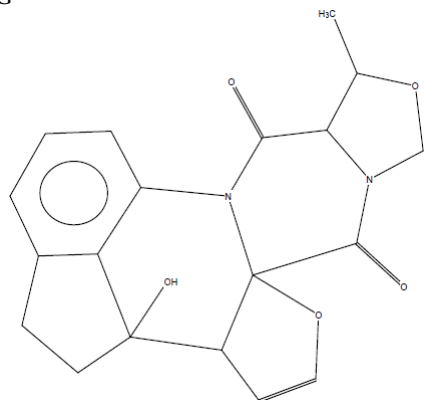

TOJQUG

TOJQUG

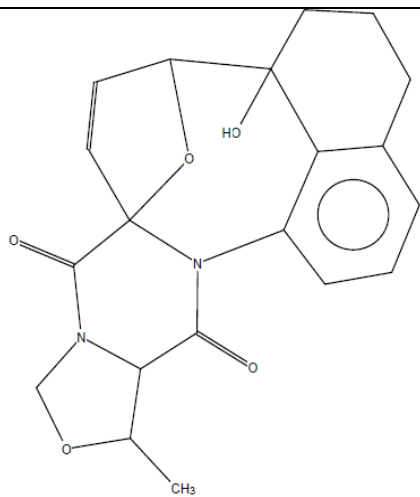

TOJRIV

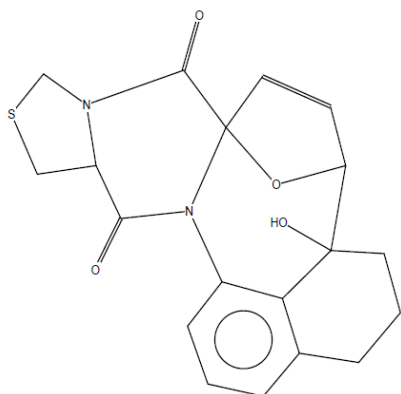

TUNZAF

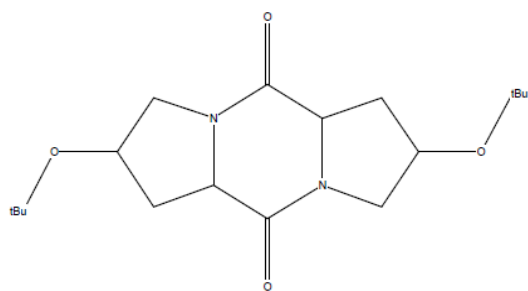

TUNZIN

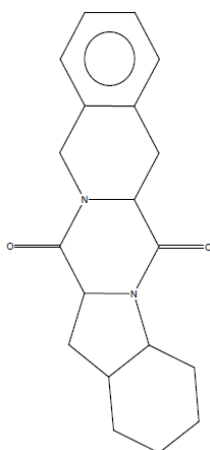

TUNZOT

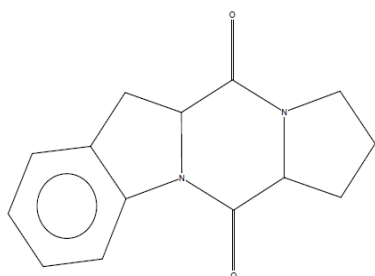



TUNZUZ

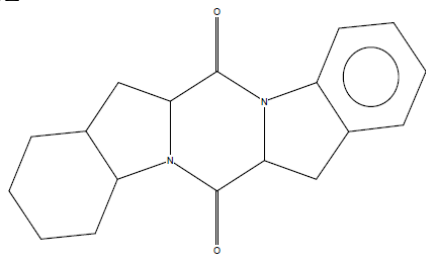

TUPBEN

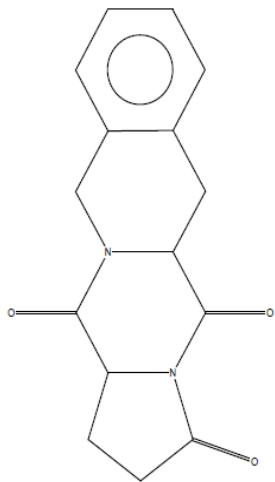

TUPBUD

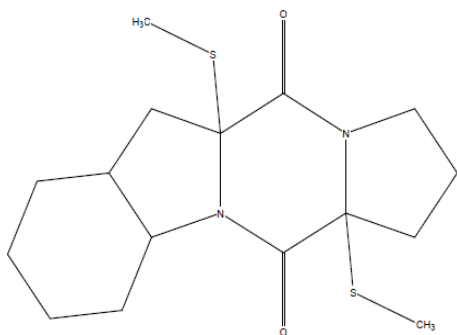

TUPJIZ

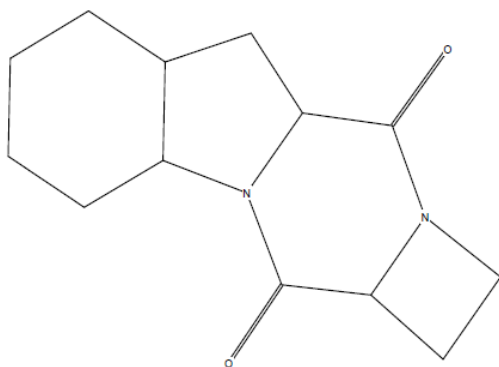

TUTSOR

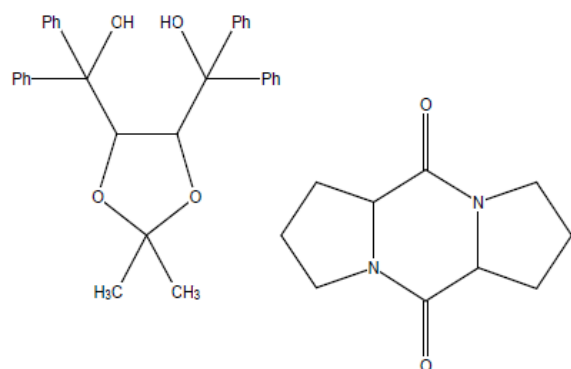

UCOB EV

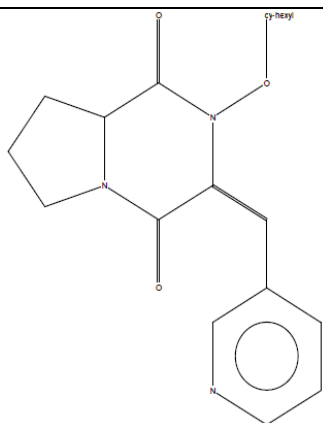

UDALUJ

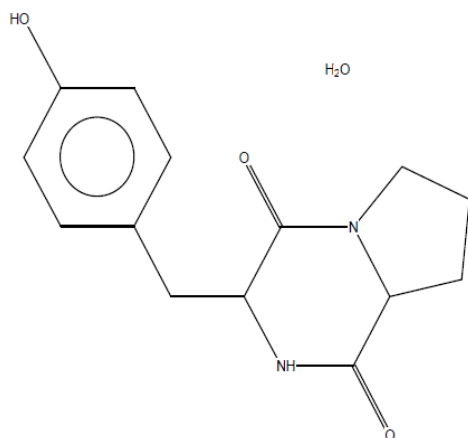

UGOQAJ

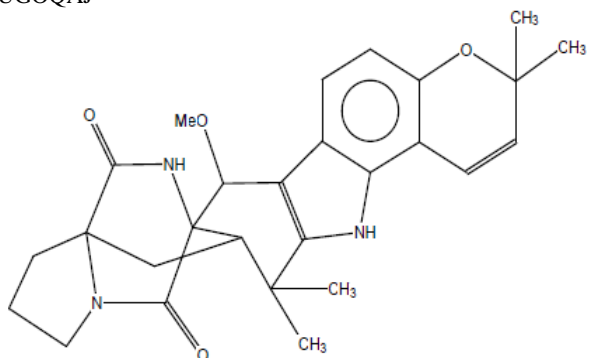

UKOCON

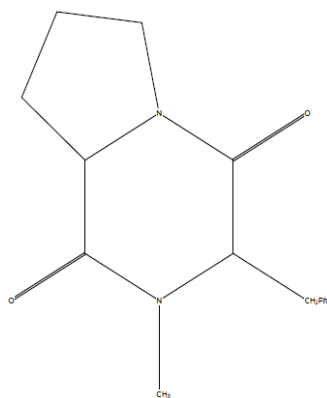

UQIMEN

|                                                                                                                         |  |  |
|-------------------------------------------------------------------------------------------------------------------------|--|--|
| 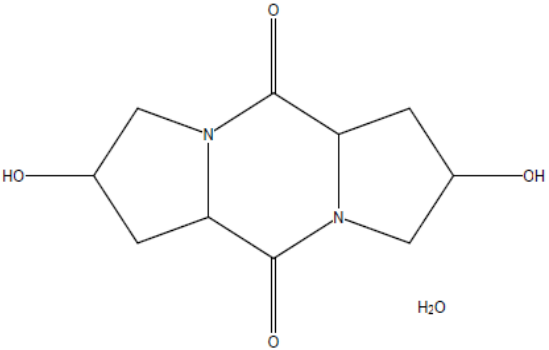 <p>H<sub>2</sub>O</p>                 |  |  |
| <p>VACPUL</p>  <p>Et-CH</p>            |  |  |
| <p>VAVZUP</p>  <p>O</p>               |  |  |
| <p>VAZRAQ</p>  <p>O</p>              |  |  |
| <p>VEVXEB</p>  <p>H<sub>3</sub>C</p> |  |  |
| <p>VIDRAB</p>                                                                                                           |  |  |

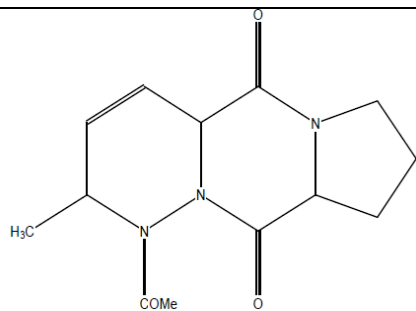

WANTEN

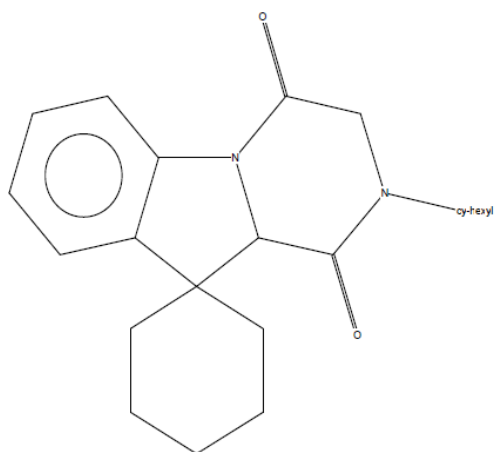

WEWWAY

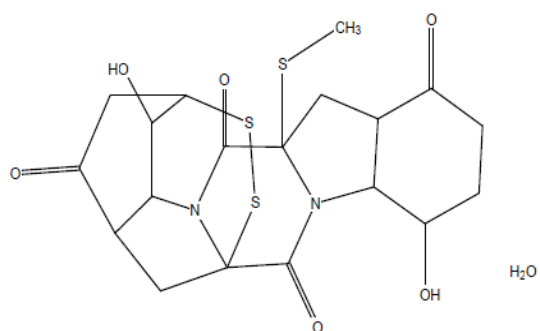

XENVES

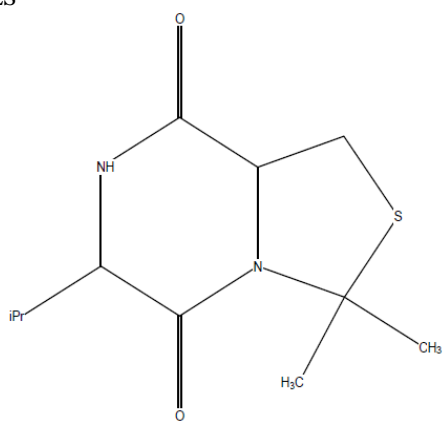

XENVIW

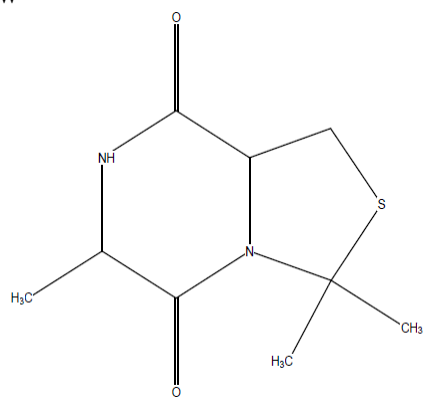

XOLQUL

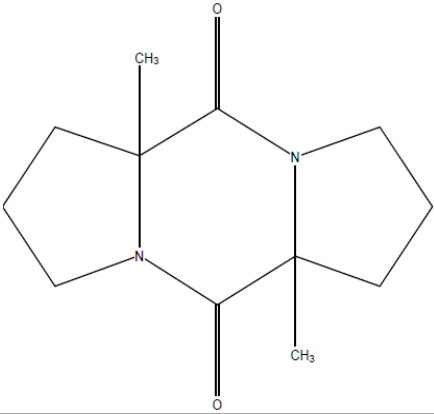

XOYYOC

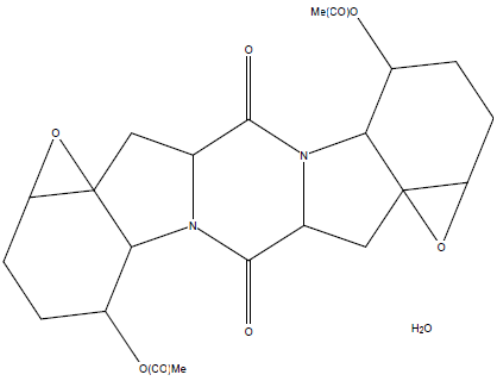

XOYYUI

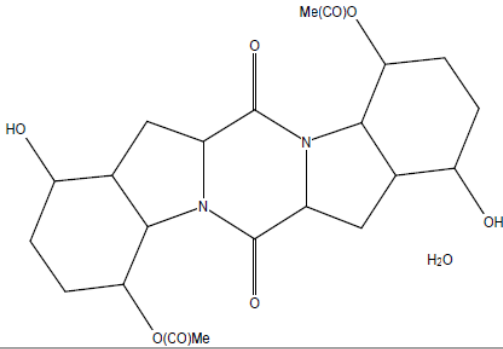

XOYZAP

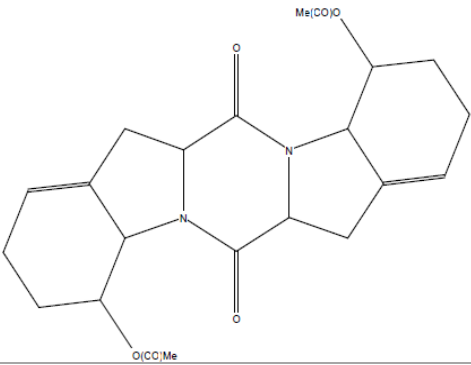

XUMCIR

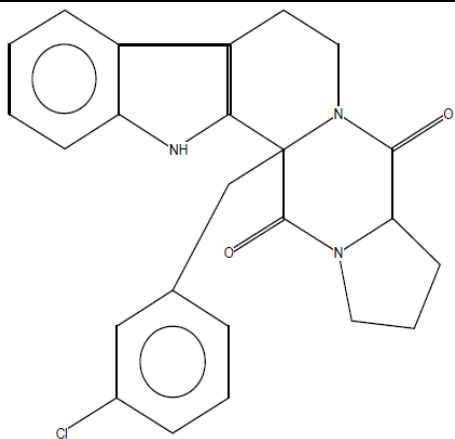

YERPIU

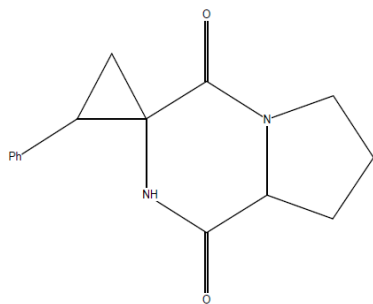

YEYXAD

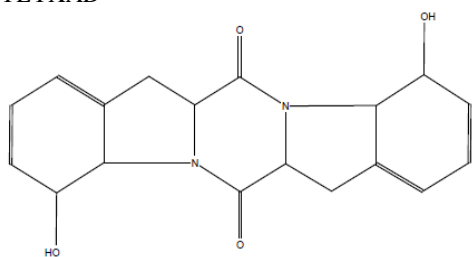

YEYXEH

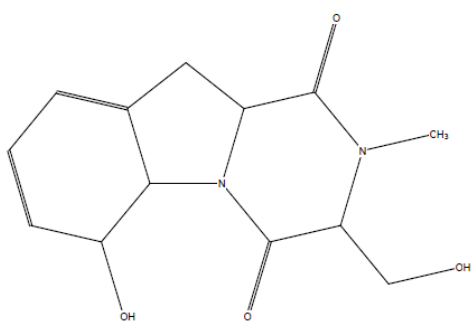

YOMXII

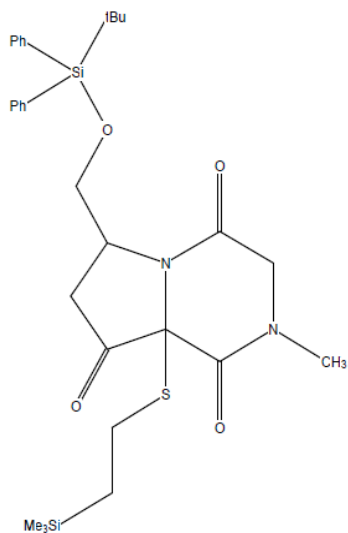

ZAJZOZ

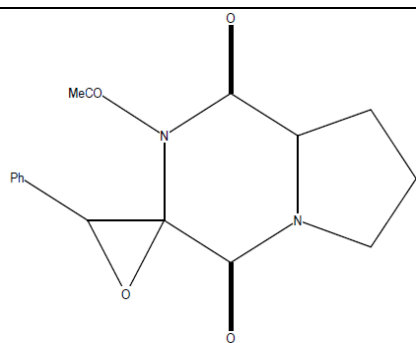

**Table S2.** Graphical schemes of proline-DKP-based supramolecular synthons (CSD, ver. May 2021).

| <i>H-bonding Interaction forming synthon</i> | <i>Synthons and CSD entries, containing these motifs</i>                                                                                                                                                                                                                                                                                                                                                                    | <i>H-bonding Interaction forming synthon</i> | <i>Synthons and CSD entries, containing these motifs</i>                                                                                                                                                                                                                                                                                                                                                                                 |
|----------------------------------------------|-----------------------------------------------------------------------------------------------------------------------------------------------------------------------------------------------------------------------------------------------------------------------------------------------------------------------------------------------------------------------------------------------------------------------------|----------------------------------------------|------------------------------------------------------------------------------------------------------------------------------------------------------------------------------------------------------------------------------------------------------------------------------------------------------------------------------------------------------------------------------------------------------------------------------------------|
|                                              | <b>D(2):</b><br>BUDDOJ, FODNEC,<br>PESYUK, TUTSOR,<br>UDALUJ<br><b>C(5):</b><br>QOJXIY, RISDIH<br><b>C(6):</b><br>BAMCEZ, JIFNER<br><b>C(8):</b><br>FEMWAV<br><b>C(10):</b><br>IMIHAP, KUXJES                                                                                                                                                                                                                               |                                              | <b>C(4):</b> PABRAM<br><b>C(5):</b> CYPRLE,<br>DUNVIS,<br>EBIFAZ,<br>JEHPUH,<br>LPROGL,<br>UDALUJ,<br>YERPIU<br><b>C(6):</b> CYPRLE,<br>EXURAQ,<br>OSELEU<br><b>C(7):</b> CYPRLE,<br>MOPQUF<br><b>C(8):</b> LEHREW,<br>NEYLIP,<br>OSELEU<br><b>C(9):</b> OSELEU,<br>RIXXIG<br><b>C(10):</b><br>AKUWUJ,<br>JEHPUH<br><b>D(2):</b><br>EXURAQ,<br>FODNES,<br>KUSXIF,<br>RIMTUE,<br>RIXXIG<br><b>D<sup>2</sup><sub>3</sub>(9):</b><br>EXURAQ |
|                                              | <b>C(4):</b> CLPRAL,<br>DARVOJ, FEXXAH,<br>ODIQUN, QAXFUT,<br>ROPVOH<br><b>C(5):</b> APUHOJ,<br>BAMCEZ, CLPRPR,<br>EBIFAZ, GESYAH,<br>GESYEL, GESYIP,<br>GLHPRD, JEHPUH,<br>JUCSAB, KETMIG,<br>LPROGL, PABRAM,<br>PUYNUS, RIMTUE,<br>ROPVOH, UKOCON,<br>XOLQUL<br><b>C(6):</b> APUHOJ,<br>BAMCEZ, CLPRAL,<br>CLPRPR, FODNUI,<br>GESYAH, GESYEL,<br>GESYOV, GUGXOW,<br>JIFNER, JUCSAB,<br>KAXQAD, KUSXIF,<br>LEHREW, LPROGL, |                                              | <b>C<sup>1</sup><sub>2</sub>(8):</b> JIFNER<br><b>C<sup>1</sup><sub>2</sub>(9):</b><br>BAMCEZ<br><b>C<sup>1</sup><sub>2</sub>(10):</b> EBIFAZ                                                                                                                                                                                                                                                                                            |

|                                                                                     |                                                                                                                                                                                                                                                                                                                                                                                                                                                                                                                                                                                                                                                                                                                                                                                                                                                      |                                                                                      |                                                                                                                                                                                                                                                                                                                  |
|-------------------------------------------------------------------------------------|------------------------------------------------------------------------------------------------------------------------------------------------------------------------------------------------------------------------------------------------------------------------------------------------------------------------------------------------------------------------------------------------------------------------------------------------------------------------------------------------------------------------------------------------------------------------------------------------------------------------------------------------------------------------------------------------------------------------------------------------------------------------------------------------------------------------------------------------------|--------------------------------------------------------------------------------------|------------------------------------------------------------------------------------------------------------------------------------------------------------------------------------------------------------------------------------------------------------------------------------------------------------------|
|                                                                                     | MOPQUF, NEYLIP,<br>ODIQUN, PABRAM,<br>PUYNUS, QAXFUT,<br>REFYIK, ROPVOH,<br>UCOBEV, UKOCON,<br>VAZRAQ, XOLQUL,<br>YERPIU, ZAJZOZ<br><b>C(7)</b> : FEXXAH,<br>FODNOC, FODNUI,<br>JAFEC, JIFNER,<br>MOPQUF, NEYLIP,<br>NOVCIK, LIKNUO,<br>PUYNUS<br><b>C(8)</b> : BUDDOJ,<br>DARVID, EBIFAZ,<br>FODNUI, JIFNER,<br>KETMIG, KUXJES,<br>ODOQUN, PUYNUS,<br>QAXFUT, YERPIU<br><b>C(9)</b> : DITGIZ,<br>FODNES, GESYEL,<br>GESYIP, GUGXOW,<br>KETMIG, KUSXIF,<br>KUXJES, MOPQUF,<br>REFYIK, RIXXIG,<br>ROPVOH, UCOBEV,<br>UKOCON, ZAJZOZ<br><b>C(10)</b> : JUCSAB,<br>DARVOJ, FEMWAV,<br>NEYLIP, NOVCIK<br><b>C<sub>2</sub>(10)</b> : BOLWEE,<br>GESYEL<br><b>D(2)</b> :<br>EXURAQ, FODNES,<br>FODNOC, GESYOV,<br>GLHPRD, KETMIG,<br>KUSXIF, KUXJES,<br>PESYUK, RIXXIG,<br>TUTSOR<br><b>D<sub>2</sub>(5)</b> : GESYOV<br><b>D<sub>2</sub>(10)</b> : GESYOV |                                                                                      |                                                                                                                                                                                                                                                                                                                  |
| 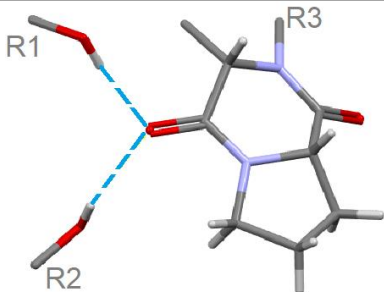 | <b>D12(3)</b> : PESYUK,<br>UDALUJ                                                                                                                                                                                                                                                                                                                                                                                                                                                                                                                                                                                                                                                                                                                                                                                                                    |                                                                                      |                                                                                                                                                                                                                                                                                                                  |
|  | <b>C<sub>1</sub>(5)</b> : EXURAQ<br><b>C<sub>1</sub>(6)</b> : CLPRAL,<br>LPROGL<br><b>C12(7)</b> : NOVCIK,<br>PABRAM<br><b>C<sub>1</sub>(8)</b> : CLPRAL,<br>CYPRLE, JEHPUH,<br>YERPIU<br><b>C<sub>1</sub>(9)</b> : EBIFAZ,<br>KUXJES, NOVCIK,<br>OSULEU<br><b>C12(10)</b> : OSULEU<br><b>D12(3)</b> : RIXXIG<br><b>D23(7)</b> : KUXJES<br><b>D23(8)</b> : RIMTUE<br><b>D23(9)</b> : KUSFIF                                                                                                                                                                                                                                                                                                                                                                                                                                                          |  | <b>C12(4)</b> :<br>LPROGL,<br>XOLQUL<br><b>C12(5)</b> :<br>BAMCEZ,<br>KAQKAD,<br>ODIQUN,<br>ROPVOH,<br>XOLQUL<br><b>C<sub>1</sub>(6)</b> :<br>BOLWEE,<br>DARVOJ,<br>JEHPUH,<br>ODIQUN,<br>ROPVOH,<br>XOLQUL<br><b>C<sub>1</sub>(7)</b> :<br>DARVID,<br>NOVCIK,<br>YERPIU,<br>XOLQUL<br><b>C<sub>1</sub>(8)</b> : |



|                                                                                     |                                                                                 |                                                                                      |                                                                                                                                                                                                                                                                                                                                                |
|-------------------------------------------------------------------------------------|---------------------------------------------------------------------------------|--------------------------------------------------------------------------------------|------------------------------------------------------------------------------------------------------------------------------------------------------------------------------------------------------------------------------------------------------------------------------------------------------------------------------------------------|
|                                                                                     |                                                                                 |                                                                                      | CLPRAL,<br>CLPRPR,<br>GESYEL,<br>GESYIP,<br>LPROGL,<br>PUYNUS,<br>REFYIK,<br>UKOCON,<br>XOLQUL<br>$C^1_2(9)$ :<br>APUHOJ,<br>CLPRPR,<br>DARVID,<br>FODNUI,<br>PABRAM,<br>RIXXIG,<br>XOLQUL<br>$C^1_2(10)$ :<br>FODNOC,<br>FODNUI<br>$D^1_2(3)$ :<br>GESYOV,<br>RIXXIG<br>$D^2_3(8)$ : GLHPRD<br>$D^2_3(9)$ : GESYOV<br>$D^2_3(10)$ :<br>FODNOC |
| 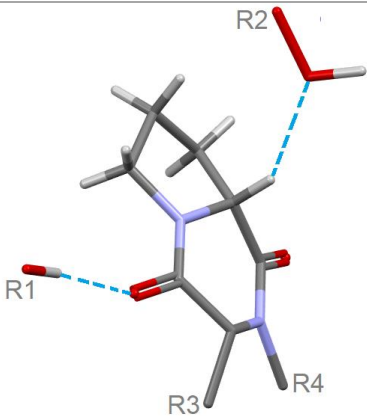  | $C^2_2(7)$ : BAMCEZ<br>$C^2_2(9)$ : FODNOC                                      |   | $C(4)$ : CLPRAL<br>$C^2_2(10)$ :<br>CLPRAL<br>$D(2)$ : BOLWEE                                                                                                                                                                                                                                                                                  |
|  | $C^2_2(10)$ : CLPRAL,<br>EBIFAZ, LPROGL,<br>MOPQUF, UDALUJ<br>$D22(8)$ : RIXXIG |  | $C^2_2(9)$ :<br>APUHOJ,<br>BAMCEZ,<br>CLPRPE,<br>GESYOV,<br>XOLQUL<br>$C^2_2(10)$ :<br>CLPRAL,<br>LIKNUO,<br>MOPQUF,<br>XOLQUL<br>$D^2_2(8)$ :<br>GESYOV,<br>NOVCIK,<br>RIXXIG,<br>REFYIK,<br>TUTSOR                                                                                                                                           |
|  | $D^2_2(8)$ : GESYOV                                                             |  | $C^2_2(10)$ :<br>CLPRAL,<br>FODNOC<br>$D^2_2(7)$ : GESYOV<br>$D^2_2(8)$ : GESYOV                                                                                                                                                                                                                                                               |

|                                                                                     |                                                                                                                 |                                                                                      |                                                                                                        |
|-------------------------------------------------------------------------------------|-----------------------------------------------------------------------------------------------------------------|--------------------------------------------------------------------------------------|--------------------------------------------------------------------------------------------------------|
| 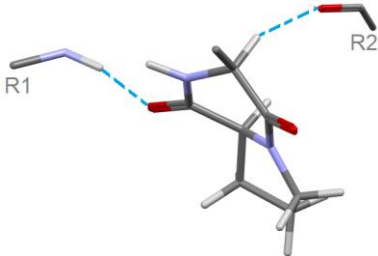    | <p><b>C<sub>2</sub><sup>2</sup>(10):</b> CLPRAL,<br/>CYPRLE<br/><b>D<sub>2</sub><sup>2</sup>(7):</b> GESYOV</p> |                                                                                      |                                                                                                        |
|    | <p><b>R<sub>2</sub><sup>2</sup>(8):</b> AKUWUY,<br/>BOLWEE, EBIFAZ,<br/>IMIHP</p>                               |    | <p><b>R<sub>2</sub><sup>2</sup>(10):</b><br/>BAMCEZ,<br/>FODNUI,<br/>GESYIP,<br/>GESYOV,<br/>JAFEC</p> |
|   | <p><b>R<sub>2</sub><sup>2</sup>(8):</b> JAFEC</p>                                                               |   | <p><b>R<sub>2</sub><sup>3</sup>(10):</b><br/>CLPRAL</p>                                                |
|  | <p><b>R<sub>1</sub><sup>1</sup>(6):</b> APUHOJ,<br/>CLPRPR, JEHPUH</p>                                          |  | <p><b>R<sub>1</sub><sup>1</sup>(5):</b> GESYOV</p>                                                     |
|  | <p><b>R<sub>1</sub><sup>1</sup>(7):</b> FODNOC,<br/>GESYOV</p>                                                  |  | <p><b>S(6):</b> AKUWUY,<br/>FODNUI</p>                                                                 |

|                                                                                    |                                              |                                                                                     |                                                                                             |
|------------------------------------------------------------------------------------|----------------------------------------------|-------------------------------------------------------------------------------------|---------------------------------------------------------------------------------------------|
| 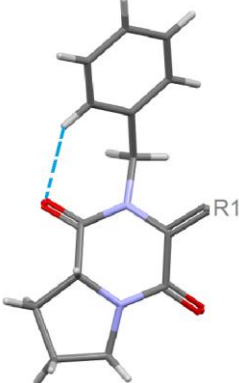  | <b>S(7):</b> BUDDOJ,<br>DITGIZ               |   | <b>S(8):</b> FEMWAY                                                                         |
|   | <b>R<sup>2</sup><sub>2</sub>(10):</b> BIDDOJ |   | <b>C<sup>2</sup><sub>2</sub>(10):</b> GESYEL<br><b>D<sup>2</sup><sub>2</sub>(7):</b> GESYOV |
|  | <b>D<sup>2</sup><sub>2</sub>(6):</b> GESYOV  |  | <b>D<sup>2</sup><sub>2</sub>(7):</b> GESYOV                                                 |

**Table S3.** Library of proline-DKP-based supramolecular synthons (CSD, ver. May 2021, see blue entries in Tb. S1), up to 10-membered H-bonding motifs.

| CSD code | ref.                             | Synthon | Interactions forming synthon                                                                                                  |
|----------|----------------------------------|---------|-------------------------------------------------------------------------------------------------------------------------------|
| AKUWUY   | C(10)                            |         | $(\text{DKP-NH})\text{N-H}\cdots\text{O}_{(\text{C=O-DKP})}$                                                                  |
|          | S(6)                             |         | $(\text{CH})\text{C-H}\cdots\text{O}=\text{C}_{(\text{DKP})}$                                                                 |
|          | R <sup>2</sup> <sub>2</sub> (8)  |         | $[(\text{DKP-NH})\text{N-H}\cdots\text{O}=\text{C}_{(\text{DKP})}]_2$                                                         |
| APUHOJ   | C(5)                             |         | $(\text{Pro-CH})\text{C-H}\cdots\text{O}=\text{C}_{(\text{DKP})}$                                                             |
|          | C(6)                             |         | $(\text{Pro-CH})\text{C-H}\cdots\text{O}=\text{C}_{(\text{DKP})}$                                                             |
|          | C <sup>1</sup> <sub>2</sub> (9)  |         | $[(\text{Pro-CH})\text{C-H}\cdots\text{O}=\text{C}_{(\text{DKP})}]_2$                                                         |
|          | C <sup>2</sup> <sub>2</sub> (9)  |         | $[(\text{Pro-CH})\text{C-H}\cdots\text{O}=\text{C}_{(\text{DKP})}]_2$                                                         |
|          | R <sup>1</sup> <sub>2</sub> (6)  |         | $[(\text{CH})\text{C-H}\cdots\text{O}=\text{C}_{(\text{DKP})}]_2$                                                             |
| BAMCEZ   | C(6)                             |         | $(\text{OH})\text{O-H}\cdots\text{O}=\text{C}_{(\text{DKP})}$                                                                 |
|          | C(6)                             |         | $(\text{Pro-CH})\text{C-H}\cdots\text{O}=\text{C}_{(\text{DKP})}$                                                             |
|          | C <sup>1</sup> <sub>2</sub> (5)  |         | $[(\text{Pro-CH})\text{C-H}\cdots\text{O}=\text{C}_{(\text{DKP})}]_2$                                                         |
|          | C <sup>1</sup> <sub>2</sub> (9)  |         | $(\text{Pro-CH})\text{C-H}\cdots\text{O}=\text{C}_{(\text{DKP})}$ & $(\text{OH})\text{O-H}\cdots\text{C-H}_{(\text{CH-Pro})}$ |
|          | C <sup>2</sup> <sub>2</sub> (7)  |         | $(\text{OH})\text{O-H}\cdots\text{O}=\text{C}_{(\text{DKP})}$ & $(\text{OH})\text{O-H}\cdots\text{C-H}_{(\text{CH-Pro})}$     |
|          | C <sup>2</sup> <sub>2</sub> (9)  |         | $[(\text{Pro-CH})\text{C-H}\cdots\text{O}=\text{C}_{(\text{DKP})}]_2$                                                         |
|          | C <sup>2</sup> <sub>2</sub> (10) |         | $[(\text{Pro-CH})\text{C-H}\cdots\text{O}=\text{C}_{(\text{DKP})}]_2$                                                         |
|          | R <sup>2</sup> <sub>2</sub> (10) |         | $[(\text{Pro-CH})\text{C-H}\cdots\text{O}=\text{C}_{(\text{DKP})}]_2$                                                         |
|          | R <sup>2</sup> <sub>2</sub> (10) |         | $[(\text{OH})\text{O-H}\cdots\text{C-H}_{(\text{CH-DKP})}]_2$                                                                 |
|          |                                  |         |                                                                                                                               |
| BIDDOJ   | S(7)                             |         | $(\text{CH})\text{C-H}\cdots\text{O}=\text{C}_{(\text{DKP})}$                                                                 |
|          | D(2)                             |         | $(\text{OH})\text{O-H}\cdots\text{O}=\text{C}_{(\text{DKP})}$                                                                 |
|          | C(8)                             |         | $(\text{CH})\text{C-H}\cdots\text{O}=\text{C}_{(\text{DKP})}$                                                                 |

|        |             |                                                                  |
|--------|-------------|------------------------------------------------------------------|
|        | $R_2^2(10)$ | $(OH)O-H\cdots O=C_{(DKP)} \& (CH)C-H\cdots O-H_{(OH)}$          |
| BOLWEE | D(2)        | $(DKP-NH)N-H\cdots O=C_{(DKP)}$                                  |
|        | D(2)        | $(Pro-CH)C-H\cdots O=C_{(DKP)}$                                  |
|        | $C_2^1(6)$  | $[(CH)C-H\cdots O=C_{(DKP)}]_2$                                  |
|        | $C_2^2(10)$ | $(DKP-NH)N-H\cdots O=C_{(DKP)} \& (CH)C-H\cdots O=C_{(DKP)}$     |
|        | $R_2^2(8)$  | $[(DKP-NH)N-H\cdots O=C_{(DKP)}]_2$                              |
| CLPRAL | C(4)        | $(Pro-NH)N-H\cdots O=C_{(DKP)}$                                  |
|        | C(4)        | $(DKP-CH)C-H\cdots O=C_{(DKP)}$                                  |
|        | C(6)        | $(CH)C-H\cdots O=C_{(DKP)}$                                      |
|        | $C_2^1(6)$  | $(DKP-NH)N-H\cdots O=C_{(DKP)} \& (CH)C-H\cdots O=C_{(DKP)}$     |
|        | $C_2^1(8)$  | $(DKP-NH)N-H\cdots O=C_{(DKP)} \& (Pro-CH)C-H\cdots O=C_{(DKP)}$ |
|        |             | $[DKP-CH)C-H\cdots O=C_{(DKP)}]_2$                               |
|        |             | $(CH)C-H\cdots O=C_{(DKP)} \& (Pro-CH)C-H\cdots O=C_{(DKP)}$     |
|        |             | $(DKP-CH)C-H\cdots O=C_{(DKP)} \& (Pro-CH)C-H\cdots O=C_{(DKP)}$ |
|        | $C_2^2(10)$ | $(Pro-CH)C-H\cdots O=C_{(DKP)} \& (DKP-NH)N-H\cdots O=C_{(DKP)}$ |
|        |             | $(CH)C-H\cdots O=C_{(DKP)} \& (DKP-NH)N-H\cdots O=C_{(DKP)}$     |
|        |             | $[Pro-CH)C-H\cdots O=C_{(DKP)}]_2$                               |
|        |             | $[DKP-CH)C-H\cdots O=C_{(DKP)}]_2$                               |
|        |             | $[(CH)C-H\cdots O=C_{(DKP)}]_2$                                  |
|        | $R_2^2(10)$ | $(Pro-CH)C-H\cdots O=C_{(DKP)} \& (CH)C-H\cdots O=C_{(DKP)}$     |
|        |             | $[(DKP-NH)N-H\cdots O=C_{(DKP)}]_2$                              |
| CLPRPR | C(5)        | $(Pro-CH)C-H\cdots O=C_{(DKP)}$                                  |
|        | C(6)        | $(Pro-CH)C-H\cdots O=C_{(DKP)}$                                  |
|        | $C_2^1(9)$  | $[(Pro-CH)C-H\cdots O=C_{(DKP)}]_2$                              |
|        | $C_2^2(9)$  | $[(Pro-CH)C-H\cdots O=C_{(DKP)}]_2$                              |
|        | $R_2^1(6)$  | $[(Pro-CH)C-H\cdots O=C_{(DKP)}]_2$                              |
| CYPRLE | C(5)        | $(DKP-NH)N-H\cdots O=C_{(DKP)}$                                  |
|        | C(6)        | $(Pro-CH)C-H\cdots O=C_{(DKP)}$                                  |
|        | C(7)        | $(CH)C-H\cdots O=C_{(DKP)}$                                      |
|        | $C_2^1(8)$  | $(Pro-NH)N-H\cdots O=C_{(DKP)} \& (CH)C-H\cdots O=C_{(DKP)}$     |
|        | $C_2^2(10)$ | $(NH)N-H\cdots O=C_{(DKP)}$                                      |
| DARVID | C(8)        | $(Pro-CH)C-H\cdots O=C$                                          |
|        |             | $(CH)C-H\cdots O=C_{(DKP)}$                                      |
|        | $C_2^1(7)$  | $[(CH)C-H\cdots O=C_{(DKP)}]_2$                                  |
|        | $C_2^1(9)$  | $[(CH)C-H\cdots O=C_{(DKP)}]_2$                                  |
|        | $C_2^2(8)$  | $(CH)C-H\cdots O=C_{(DKP)} \& (Pro-CH)C-H\cdots O=C_{(C-O-C)}$   |
|        | $R_2^2(10)$ | $[(DKP-CH)C-H\cdots O=C_{(DKP)}]_2$                              |
| DARWOJ | C(4)        | $(Pro-CH)C-H\cdots O=C$                                          |
|        |             | $(DKP-CH)C-H\cdots O=C_{(DKP)}$                                  |
|        | C(6)        | $(DKP-CH)C-H\cdots O=C$                                          |
|        | C(10)       | $(CH)C-H\cdots O=C_{(DKP)}$                                      |
|        | $C_2^1(6)$  | $(Pro-CH)C-H\cdots O=C \& (DKP-CH)C-H\cdots O=C_{(DKP)}$         |
|        | $C_2^2(10)$ | $(DKP-CH)C-H\cdots O=C_{(DKP)} \& (Pro-CH)C-H\cdots O=C$         |
|        | $R_2^2(6)$  | $(DKP-CH)C-H\cdots O=C_{(DKP)} \& (CH)C-H\cdots O=C$             |
|        | DITGIZ      | $(CH)C-H\cdots O=C_{(DKP)}$                                      |
|        | C(9)        | $(CH)C-H\cdots O=C_{(DKP)}$                                      |
|        | DUNVIS      | $(DKP-NH)N-H\cdots O=C_{(DKP)}$                                  |
| EBIFAZ | C(5)        | $(DKP-NH)N-H\cdots O=C_{(DKP)}$                                  |
|        | C(5)        | $(DKP-CH)C-H\cdots O=C_{(DKP)}$                                  |
|        | C(8)        | $(CH)C-H\cdots O=C_{(DKP)}$                                      |
|        | $C_2^1(9)$  | $(DKP-NH)N-H\cdots O=C_{(DKP)} \& (CH)C-H\cdots O=C_{(DKP)}$     |
|        | $C_2^1(10)$ | $(OH)O-H\cdots O=C_{(DKP)} \& (DKP-CH)C-H\cdots O=C_{(DKP)}$     |
|        | $C_2^2(10)$ | $(DKP-NH)N-H\cdots O=C_{(DKP)} \& (DKP-CH)C-H\cdots O=C_{(DKP)}$ |
|        | $R_2^2(8)$  | $(DKP-CH)C-H\cdots O=C_{(DKP)} \& (DKP-NH)N-H\cdots O=C_{(DKP)}$ |
|        | EXURAZ      | $(NH)N-H\cdots O=C_{(DKP)}$                                      |
|        |             | $(CH)C-H\cdots O=C_{(DKP)}$                                      |
|        |             | $(DKP-NH)N-H\cdots O=C_{(DKP)}$                                  |
|        | C(6)        | $(NH)N-H\cdots O=C_{(DKP)}$                                      |
|        | $C_2^1(5)$  | $(NH)N-H\cdots O=C_{(DKP)} \& (Pro-CH)C-H\cdots O=C_{(DKP)}$     |
|        | $D_2^3(9)$  | $[(NH)N-H\cdots O=C_{(DKP)}]_2$                                  |
| FEMWAV | S(7)        | $(CH)C-H\cdots O=C_{(DKP)}$                                      |
|        | S(8)        | $(CH)C-H\cdots O=C_{(DKP)}$                                      |
|        | C(8)        | $(OH)O-H\cdots O=C_{(DKP)}$                                      |
| FEXXAH | C(4)        | $(DKP-CH)C-H\cdots O=C_{(DKP)}$                                  |
|        | C(7)        | $(CH)C-H\cdots O=C_{(DKP)}$                                      |
|        | $C_2^2(9)$  | $(CH)C-H\cdots O=C_{(DKP)} \& (CH)C-H\cdots O=C_{(C=O)}$         |
| FODNES | D(2)        | $(Pro-CH)C-H\cdots O=C_{(DKP)}$                                  |
|        |             | $(NH)N-H\cdots O=C_{(DKP)}$                                      |
|        | C(9)        | $(CH)C-H\cdots O=C_{(DKP)}$                                      |
| FODNOC | D(2)        | $(OH)O-H\cdots O=C_{(DKP)}$                                      |

|        |                                  |                                                                                                                 |
|--------|----------------------------------|-----------------------------------------------------------------------------------------------------------------|
|        | D <sub>3</sub> <sup>2</sup> (10) | (CH) <sub>3</sub> C-H···O=C <sub>(DKP)</sub>                                                                    |
|        | C(7)                             | [ <sub>(CH)3</sub> C-H···O=C <sub>(DKP)</sub> ] <sub>2</sub> & (Pro-CH) <sub>3</sub> C-H···O=C <sub>(DKP)</sub> |
|        | C <sub>2</sub> <sup>1</sup> (10) | [ <sub>(CH)3</sub> C-H···O=C <sub>(DKP)</sub> ] <sub>2</sub>                                                    |
|        | C <sub>2</sub> <sup>2</sup> (9)  | (OH) <sub>3</sub> O-H···O=C <sub>(DKP)</sub> & (DKP-CH) <sub>3</sub> C-H···O=C <sub>(DKP)</sub>                 |
|        | C <sub>2</sub> <sup>2</sup> (10) | (Pro-CH) <sub>3</sub> C-H···O=C <sub>(DKP)</sub> & (CH) <sub>3</sub> C-H···O=C <sub>(DKP)</sub>                 |
|        |                                  | [ <sub>(Pro-CH)3</sub> C-H···O=C <sub>(DKP)</sub> ] <sub>2</sub>                                                |
|        | R <sub>2</sub> <sup>1</sup> (7)  | (OH) <sub>3</sub> O-H···O=C <sub>(DKP)</sub> & (CH) <sub>3</sub> C-H···O=C <sub>(DKP)</sub>                     |
|        | R <sub>2</sub> <sup>2</sup> (8)  | (CH) <sub>3</sub> C-H···O=C <sub>(DKP)</sub> & (CH) <sub>3</sub> C-H···O <sub>(C-O-C)</sub>                     |
|        | R <sub>2</sub> <sup>2</sup> (10) | (OH) <sub>3</sub> O-H···O=C <sub>(DKP)</sub> & (CH) <sub>3</sub> C-H···O-H <sub>(OH)</sub>                      |
|        |                                  | (OH) <sub>3</sub> O-H···O=C <sub>(DKP)</sub> & (CH) <sub>3</sub> C-H···O-H <sub>(OH)</sub>                      |
| FODNUI | S(6)                             | (CH) <sub>3</sub> C-H···O=C <sub>(DKP)</sub>                                                                    |
|        | C(6)                             | (CH) <sub>3</sub> C-H···O=C <sub>(DKP)</sub>                                                                    |
|        | C(7)                             | (CH) <sub>3</sub> C-H···O=C <sub>(DKP)</sub>                                                                    |
|        | C(8)                             | (CH) <sub>3</sub> C-H···O=C <sub>(DKP)</sub>                                                                    |
|        | C <sub>2</sub> <sup>1</sup> (9)  | (CH) <sub>3</sub> C-H···O=C <sub>(DKP)</sub> & (Pro-CH) <sub>3</sub> C-H···O=C <sub>(DKP)</sub>                 |
|        | C <sub>2</sub> <sup>1</sup> (10) | (CH) <sub>3</sub> C-H···O=C <sub>(DKP)</sub> & (Pro-CH) <sub>3</sub> C-H···O=C <sub>(DKP)</sub>                 |
|        | R <sub>2</sub> <sup>2</sup> (10) | [ <sub>(Pro-CH)3</sub> C-H···O=C <sub>(DKP)</sub> ] <sub>2</sub>                                                |
| GESYAH | C(5)                             | (CH) <sub>3</sub> C-H···O=C <sub>(DKP)</sub>                                                                    |
|        | C(6)                             | (CH) <sub>3</sub> C-H···O=C <sub>(DKP)</sub>                                                                    |
| GESYEI | C(5)                             | (DKP-CH) <sub>3</sub> C-H···O=C <sub>(DKP)</sub>                                                                |
|        | C(6)                             | (Pro-CH) <sub>3</sub> C-H···O=C <sub>(DKP)</sub>                                                                |
|        |                                  | (CH) <sub>3</sub> C-H···O=C <sub>(DKP)</sub>                                                                    |
|        | C(9)                             | (CH) <sub>3</sub> C-H···O=C <sub>(DKP)</sub>                                                                    |
|        |                                  | (CH) <sub>3</sub> C-H···S <sub>(Pro)</sub>                                                                      |
|        | C <sub>2</sub> <sup>1</sup> (8)  | (CH) <sub>3</sub> C-H···O=C <sub>(DKP)</sub> & (Pro-CH) <sub>3</sub> C-H···O=C <sub>(DKP)</sub>                 |
|        | C <sub>2</sub> <sup>2</sup> (10) | (DKP-CH) <sub>3</sub> C-H···O=C <sub>(DKP)</sub> & (CH) <sub>3</sub> C-H···S <sub>(Pro)</sub>                   |
|        |                                  | (DKP) <sub>3</sub> C-H···O=C <sub>(DKP)</sub> & (CH) <sub>3</sub> C-H···S <sub>(Pro)</sub>                      |
|        | R <sub>2</sub> <sup>2</sup> (9)  | (DKP-CH) <sub>3</sub> C-H···O=C <sub>(DKP)</sub> & (CH) <sub>3</sub> C-H···O=C <sub>(DKP)</sub>                 |
| GESYIP | C(5)                             | (Pro-CH) <sub>3</sub> C-H···O=C <sub>(DKP)</sub>                                                                |
|        |                                  | (CH) <sub>3</sub> C-H···O=C <sub>(DKP)</sub>                                                                    |
|        | C(9)                             | (CH) <sub>3</sub> C-H···O=C <sub>(DKP)</sub>                                                                    |
|        | C <sub>2</sub> <sup>1</sup> (8)  | (CH) <sub>3</sub> C-H···O=C <sub>(DKP)</sub> & (Pro-CH) <sub>3</sub> C-H···O=C <sub>(DKP)</sub>                 |
|        | R <sub>2</sub> <sup>2</sup> (10) | (Pro-CH) <sub>3</sub> C-H···O=C <sub>(DKP)</sub> & (CH) <sub>3</sub> C-H···O=C <sub>(DKP)</sub>                 |
| GESYOV | D(2)                             | (DKP-CH) <sub>3</sub> C-H···O=C <sub>(DKP)</sub>                                                                |
|        |                                  | (Pro-CH) <sub>3</sub> C-H···O=C <sub>(DKP)</sub>                                                                |
|        |                                  | (Pro-CH) <sub>3</sub> C-H···O=C <sub>(DKP)</sub>                                                                |
|        | D <sub>2</sub> <sup>1</sup> (3)  | (Pro-CH) <sub>3</sub> C-H···O=C <sub>(DKP)</sub> & (DKP-CH) <sub>3</sub> C-H···O=C <sub>(DKP)</sub>             |
|        | D <sub>2</sub> <sup>2</sup> (5)  | (Pro-CH) <sub>3</sub> C-H···S <sub>(Pro)</sub> & (Pro-CH) <sub>3</sub> C-H···O=C <sub>(DKP)</sub>               |
|        |                                  | (Pro-CH) <sub>3</sub> C-H···O=C <sub>(DKP)</sub> & (DKP/Pro-CH) <sub>3</sub> C-H···S <sub>(Pro)</sub>           |
|        | D <sub>2</sub> <sup>2</sup> (6)  | (CH) <sub>3</sub> C-H···O=C <sub>(DKP)</sub> & (DKP-CH) <sub>3</sub> C-H···O=C <sub>(DKP)</sub>                 |
|        |                                  | (Pro-CH) <sub>3</sub> C-H···S <sub>(Pro)</sub> & (DKP/Pro-CH) <sub>3</sub> C-H···O=C <sub>(DKP)</sub>           |
|        | D <sub>2</sub> <sup>2</sup> (7)  | (DKP-CH) <sub>3</sub> C-H···S <sub>(Pro)</sub> & (DKP-CH) <sub>3</sub> C-H···O=C <sub>(DKP)</sub>               |
|        |                                  | (DKP/Pro-CH) <sub>3</sub> C-H···O=C <sub>(DKP)</sub> & (CH-Pro/DKP) <sub>3</sub> C-H···S <sub>(Pro)</sub>       |
|        |                                  | (DKP-CH) <sub>3</sub> C-H···O=C <sub>(DKP)</sub> & (CH) <sub>3</sub> C-H···O=C <sub>(DKP)</sub>                 |
|        | D <sub>2</sub> <sup>2</sup> (8)  | [ <sub>(DKP-CH)3</sub> C-H···O=C <sub>(DKP)</sub> ] <sub>2</sub>                                                |
|        |                                  | (Pro-CH) <sub>3</sub> C-H···O=C <sub>(DKP)</sub> ] <sub>2</sub>                                                 |
|        |                                  | (Pro-CH) <sub>3</sub> C-H···O=C <sub>(DKP)</sub> & (DKP-CH) <sub>3</sub> C-H···O=C <sub>(DKP)</sub>             |
|        |                                  | (DKP-CH) <sub>3</sub> C-H···O=C <sub>(DKP)</sub> & (Pro-CH) <sub>3</sub> C-H···O=C <sub>(DKP)</sub>             |
|        | D <sub>2</sub> <sup>2</sup> (9)  | (CH) <sub>3</sub> C-H···O=C <sub>(DKP)</sub> & (Pro-CH) <sub>3</sub> C-H···S <sub>(Pro)</sub>                   |
|        | D <sub>3</sub> <sup>2</sup> (9)  | [ <sub>(CH)3</sub> C-H···O=C <sub>(DKP)</sub> ] <sub>2</sub> & (CH-Pro) <sub>3</sub> C-H···O=C <sub>(DKP)</sub> |
|        | D <sub>2</sub> <sup>2</sup> (10) | (Pro-CH) <sub>3</sub> C-H···O=C <sub>(DKP)</sub> & (CH) <sub>3</sub> C-H···O=C <sub>(DKP)</sub>                 |
|        |                                  | (DKP-CH) <sub>3</sub> C-H···O=C <sub>(DKP)</sub> & (CH) <sub>3</sub> C-H···S <sub>(Pro)</sub>                   |
|        |                                  | (DKP-CH) <sub>3</sub> C-H···O=C <sub>(DKP)</sub> & (CH) <sub>3</sub> C-H···S <sub>(Pro)</sub>                   |
|        | C(9)                             | (Pro-CH) <sub>3</sub> C-H···S <sub>(Pro)</sub>                                                                  |
|        | C <sub>2</sub> <sup>1</sup> (8)  | (DKP-CH) <sub>3</sub> C-H···S <sub>(Pro)</sub> & (Pro-CH) <sub>3</sub> C-H···S <sub>(Pro)</sub>                 |
|        | C <sub>2</sub> <sup>2</sup> (9)  | (Pro-CH) <sub>3</sub> C-H···O=C <sub>(DKP)</sub> & (Pro-CH) <sub>3</sub> C-H···S <sub>(Pro)</sub>               |
|        |                                  | [ <sub>(CH)3</sub> C-H···O=C <sub>(DKP)</sub> ] <sub>2</sub>                                                    |
|        | C <sub>2</sub> <sup>2</sup> (10) | (Pro-CH) <sub>3</sub> C-H···O=C <sub>(DKP)</sub> & (Pro-CH) <sub>3</sub> C-H···O=C <sub>(DKP)</sub>             |
|        |                                  | (Pro-CH) <sub>3</sub> C-H···O=C <sub>(DKP)</sub> & (Pro-CH) <sub>3</sub> C-H···S <sub>(Pro)</sub>               |
|        | R <sub>2</sub> <sup>1</sup> (5)  | (Pro-CH) <sub>3</sub> C-H···O=C <sub>(DKP)</sub> & (Pro-CH) <sub>3</sub> C-H···O=C <sub>(DKP)</sub>             |
|        | R <sub>2</sub> <sup>1</sup> (7)  | [ <sub>(CH)3</sub> C-H···O=C <sub>(DKP)</sub> ] <sub>2</sub>                                                    |
|        | R <sub>2</sub> <sup>1</sup> (9)  | [ <sub>(CH)3</sub> C-H···O=C <sub>(DKP)</sub> ] <sub>2</sub>                                                    |
|        | R <sub>2</sub> <sup>2</sup> (7)  | (Pro-CH) <sub>3</sub> C-H···O=C <sub>(DKP)</sub> & (DKP-CH) <sub>3</sub> C-H···S <sub>(Pro)</sub>               |
|        | R <sub>2</sub> <sup>2</sup> (9)  | (Pro/DKP-CH) <sub>3</sub> C-H···O=C <sub>(DKP)</sub> & (CH) <sub>3</sub> C-H···O=C <sub>(DKP)</sub>             |
|        | R <sub>2</sub> <sup>2</sup> (10) | (CH) <sub>3</sub> C-H···O=C <sub>(DKP)</sub> & (CH-Pro) <sub>3</sub> C-H···O=C <sub>(DKP)</sub>                 |

|        |                                  |                                                                                                                        |
|--------|----------------------------------|------------------------------------------------------------------------------------------------------------------------|
|        | D <sub>2</sub> <sup>2</sup> (5)  | (Pro-CH) <sub>2</sub> C-H...O=C(DKP) & (Pro-CH) <sub>2</sub> C-H...O(H <sub>2</sub> O)                                 |
|        | D <sub>2</sub> <sup>2</sup> (6)  | (Pro-CH) <sub>2</sub> C-H...O=C(Pro) & (Pro-CH) <sub>2</sub> C-H...O(H <sub>2</sub> O)                                 |
|        |                                  | (Pro-CH) <sub>2</sub> C-H...O(C=O) & (Pro-CH) <sub>2</sub> C-H...O(H <sub>2</sub> O)                                   |
|        | D <sub>2</sub> <sup>2</sup> (7)  | (DKP/Pro-CH) <sub>2</sub> C-H...O=C(DKP) & (Pro-CH) <sub>2</sub> C-H...O(H <sub>2</sub> O)                             |
|        | D <sub>2</sub> <sup>2</sup> (8)  | (Pro-CH) <sub>2</sub> C-H...O=C(DKP) & (Pro-CH) <sub>2</sub> C-H...O(H <sub>2</sub> O)                                 |
|        | D <sub>2</sub> <sup>2</sup> (9)  | (DKP/Pro-CH) <sub>2</sub> C-H...O=C(DKP) & (Pro-CH) <sub>2</sub> C-H...O(H <sub>2</sub> O)                             |
|        | D <sub>3</sub> <sup>2</sup> (8)  | (Pro/DKP-CH) <sub>2</sub> C-H...O=C(DKP) & (Pro-CH) <sub>2</sub> C-H...O=C(DKP) & (DKP-CH) <sub>2</sub> C-H...O=C(DKP) |
|        | C <sub>2</sub> <sup>2</sup> (9)  | [ <sub>(DKP-CH)</sub> C-H...O=C(DKP)] <sub>2</sub>                                                                     |
|        | C <sub>2</sub> <sup>2</sup> (10) | (Pro-CH) <sub>2</sub> C-H...O=C(DKP) & (Pro-CH) <sub>2</sub> C-H...O(C=O)                                              |
| GUGXOW | C(6)                             | (Pro-CH) <sub>2</sub> C-H...O(C=O)                                                                                     |
|        |                                  | (DKP/Pro-CH) <sub>2</sub> C-H...O(C-O-C)                                                                               |
|        | C(9)                             | (Pro-CH) <sub>2</sub> C-H...O(C=O)                                                                                     |
|        | C <sub>2</sub> <sup>2</sup> (10) | (Pro-CH) <sub>2</sub> C-H...O=C(DKP) & (Pro-CH) <sub>2</sub> C-H...O(C=O)                                              |
|        | R <sub>2</sub> <sup>2</sup> (8)  | (Pro-CH) <sub>2</sub> C-H...O=C(DKP) & (DKP-CH) <sub>2</sub> C-H...O(C-O-C)                                            |
| IMIHP  | D(2)                             | (DKP-CH) <sub>2</sub> C-H...O=C(DKP)                                                                                   |
|        | D <sub>3</sub> <sup>2</sup> (7)  | [ <sub>(CH)</sub> C-H...O=C(DKP)] <sub>2</sub> & (DKP-NH) <sub>2</sub> N-H...O=C(DKP)                                  |
|        | C(9)                             | (CH) <sub>2</sub> C-H...O=C(DKP)                                                                                       |
|        | C(10)                            | (OH) <sub>2</sub> O-H...O=C(DKP)                                                                                       |
|        | C <sub>2</sub> <sup>1</sup> (9)  | (CH) <sub>2</sub> C-H...O=C(DKP) & (DKP/NH) <sub>2</sub> N-H...O=C(DKP)                                                |
|        | R <sub>2</sub> <sup>2</sup> (8)  | [ <sub>(DKP-NH)</sub> N-H...O=C(DKP)] <sub>2</sub>                                                                     |
| JAFFEC | C(7)                             | (CH) <sub>2</sub> C-H...O=C(DKP)                                                                                       |
|        | R <sub>2</sub> <sup>2</sup> (8)  | [ <sub>(Pro/DKP-CH)</sub> C-H...O=C(DKP)] <sub>2</sub>                                                                 |
|        | R <sub>2</sub> <sup>2</sup> (10) | [ <sub>(Pro/DKP-CH)</sub> C-H...O=C(DKP)] <sub>2</sub>                                                                 |
| JEHPUH | C(5)                             | (DKP-NH) <sub>2</sub> N-H...O=C(DKP)                                                                                   |
|        |                                  | (CH) <sub>2</sub> C-H...O=C(DKP)                                                                                       |
|        | C(10)                            | (NH) <sub>2</sub> N-H...O=C(DKP)                                                                                       |
|        | C <sub>2</sub> <sup>1</sup> (8)  | (CH) <sub>2</sub> C-H...O=C(DKP) & (NH) <sub>2</sub> N-H...O=C(DKP)                                                    |
|        | C <sub>2</sub> <sup>2</sup> (8)  | (DKP/Pro-CH) <sub>2</sub> C-H...O=C(DKP) & (NH) <sub>2</sub> N-H...O=C(DKP)                                            |
|        | C <sub>2</sub> <sup>2</sup> (10) | (Pro-CH) <sub>2</sub> C-H...O=C(DKP) & (DKP/NH) <sub>2</sub> N-H...O=C(DKP)                                            |
|        | R <sub>2</sub> <sup>1</sup> (6)  | (CH) <sub>2</sub> C-H...O=C(DKP) & (DKP-NH) <sub>2</sub> N-H...O=C(DKP)                                                |
| JIFNER | C(6)                             | (OH) <sub>2</sub> O-H...O=C(DKP)                                                                                       |
|        |                                  | (Pro-CH) <sub>2</sub> C-H...O=C(DKP)                                                                                   |
|        | C(7)                             | (CH) <sub>2</sub> C-H...O=C(DKP)                                                                                       |
|        | C <sub>2</sub> <sup>1</sup> (8)  | (Pro-CH) <sub>2</sub> C-H...O=C(DKP) & (OH) <sub>2</sub> O-H...O=C(DKP)                                                |
|        | C <sub>2</sub> <sup>2</sup> (9)  | (CH) <sub>2</sub> C-H...O=C(DKP) & (CH) <sub>2</sub> C-H...O(OH)                                                       |
|        | C <sub>2</sub> <sup>2</sup> (10) | (CH) <sub>2</sub> C-H...O(OH) & (OH) <sub>2</sub> O-H...O=C(DKP)                                                       |
| JUCSAB | C(5)                             | (DKP-CH) <sub>2</sub> C-H...O=C(DKP)                                                                                   |
|        | C(6)                             | (CH) <sub>2</sub> C-H...O=C(DKP)                                                                                       |
|        | C(10)                            | (CH) <sub>2</sub> C-H...O=C(DKP)                                                                                       |
| KAQXAD | S(6)                             | (CH) <sub>2</sub> C-H...O=C(DKP)                                                                                       |
|        | C(6)                             | (Pro-CH) <sub>2</sub> C-H...O=C(DKP)                                                                                   |
|        | C <sub>2</sub> <sup>1</sup> (5)  | [ <sub>(Pro-CH)</sub> C-H...O=C(DKP)] <sub>2</sub>                                                                     |
| KETMIG | D(2)                             | (Pro-CH) <sub>2</sub> C-H...O=C(DKP)                                                                                   |
|        | C(5)                             | (Pro-CH) <sub>2</sub> C-H...O=C(DKP)                                                                                   |
|        | C(8)                             | (CH) <sub>2</sub> C-H...O=C(DKP)                                                                                       |
|        | C(9)                             | (CH) <sub>2</sub> C-H...O=C(DKP)                                                                                       |
|        | R <sub>2</sub> <sup>1</sup> (7)  | [ <sub>(CH)</sub> C-H...O=C(DKP)] <sub>2</sub>                                                                         |
| KUSXIF | D(2)                             | (DKP-NH) <sub>2</sub> N-H...O=C(DKP)                                                                                   |
|        |                                  | (CH) <sub>2</sub> C-H...O=C(DKP)                                                                                       |
|        | D <sub>3</sub> <sup>2</sup> (9)  | (CH) <sub>2</sub> C-H...O=C(DKP) & (NH) <sub>2</sub> N-H...O=C(DKP)                                                    |
|        |                                  | (CH) <sub>2</sub> C-H...O=C(DKP) & (DKP-NH) <sub>2</sub> N-H...O=C(DKP)                                                |
|        | C(6)                             | (CH) <sub>2</sub> C-H...O=C(DKP)                                                                                       |
|        | C(9)                             | (CH) <sub>2</sub> C-H...O=C(DKP)                                                                                       |
|        | S(7)                             | (CH) <sub>2</sub> C-H...O=C(DKP)                                                                                       |
|        | R <sub>2</sub> <sup>2</sup> (8)  | [ <sub>(DKP-NH)</sub> N-H...O=C(DKP)] <sub>2</sub>                                                                     |
| KUXJES | D(2)                             | (Pro-CH) <sub>2</sub> C-H...O=C(DKP)                                                                                   |
|        | D <sub>3</sub> <sup>2</sup> (7)  | (DKP-CH) <sub>2</sub> C-H...O=C(DKP) & (CH) <sub>2</sub> C-H...O=C(DKP) & (NH) <sub>2</sub> N-H...O=C(DKP)             |
|        |                                  | (Pro-CH) <sub>2</sub> C-H...O=C(DKP)                                                                                   |
|        | C(8)                             | (CH) <sub>2</sub> C-H...O=C(DKP)                                                                                       |
|        | C(9)                             | (CH) <sub>2</sub> C-H...O=C(DKP)                                                                                       |
|        | C(10)                            | (OH) <sub>2</sub> O-H...O=C(DKP)                                                                                       |
|        | C <sub>2</sub> <sup>1</sup> (9)  | (DKP-NH) <sub>2</sub> N-H...O=C(DKP) & (CH) <sub>2</sub> C-H...O=C(DKP)                                                |
|        | R <sub>2</sub> <sup>1</sup> (6)  | (CH) <sub>2</sub> C-H...O=C(DKP) & (OH) <sub>2</sub> O-H...O=C(DKP)                                                    |
|        | R <sub>2</sub> <sup>2</sup> (8)  | [ <sub>(NH)</sub> N-H...O=C(DKP)] <sub>2</sub>                                                                         |
| LEHREW | C(6)                             | (CH) <sub>2</sub> C-H...O=C(DKP)                                                                                       |
|        | C(8)                             | (NH) <sub>2</sub> N-H...O=C(DKP)                                                                                       |
| LIKNUO | C(7)                             | (Pro-CH) <sub>2</sub> C-H...O=C(DKP)                                                                                   |
|        | C(10)                            | (CH) <sub>2</sub> C-H...O(C=O)                                                                                         |
|        | C <sub>2</sub> <sup>3</sup> (10) | (DKP-CH) <sub>2</sub> C-H...O(C=O) & (Pro-CH) <sub>2</sub> C-H...O=C(DKP)                                              |
|        |                                  | [ <sub>(Pro-CH)</sub> C-H...O=C(DKP)] <sub>2</sub>                                                                     |

[illegible]

|        |             |                                                                  |
|--------|-------------|------------------------------------------------------------------|
|        |             | $(CH)C-H\cdots O=C_{(DKP)} \& (Pro-CH)C-H\cdots O-H_{(OH)}$      |
|        | $D^2_2(8)$  | $(OH)O-H\cdots O=C_{(DKP)} \& (Pro-CH)C-H\cdots O=C_{(DKP)}$     |
|        |             | $(OH)O-H\cdots O=C_{(DKP)} \& (Pro-CH)C-H\cdots O-H_{(OH)}$      |
|        |             | $(OH)O-H\cdots O=C_{(DKP)} \& (Pro-CH)C-H\cdots O=C_{(DKP)}$     |
|        | $D^2_2(9)$  | $(OH)O-H\cdots O=C_{(DKP)} \& (Pro-CH)C-H\cdots O-H_{(OH)}$      |
|        | $D^2_2(10)$ | $[(OH)O-H\cdots O=C_{(DKP)}]_2$                                  |
|        |             | $[(OH)O-H\cdots O=C_{(DKP)}]_2$                                  |
|        |             | $(OH)O-H\cdots O=C_{(DKP)} \& (Pro-CH)C-H\cdots O=C_{(DKP)}$     |
|        |             | $(Pro-CH)C-H\cdots O-H_{(OH)} \& (Pro-CH)C-H\cdots O=C_{(DKP)}$  |
|        | $C^2_2(10)$ | $[(Pro-CH)C-H\cdots O=C_{(DKP)}]_2$                              |
|        | $R^2_2(7)$  | $(OH)O-H\cdots O=C_{(DKP)} \& (Pro-CH)C-H\cdots O-H_{(OH)}$      |
| PUYNUS | $C(5)$      | $(Pro-CH)C-H\cdots O=C_{(DKP)}$                                  |
|        | $C(6)$      | $(DKP/Pro-CH)C-H\cdots O=C_{(DKP)}$                              |
|        | $C(7)$      | $(CH)C-H\cdots O=C_{(DKP)}$                                      |
|        | $C(8)$      | $(DKP/Pro-CH)C-H\cdots O=C_{(DKP)}$                              |
|        | $C^1_2(8)$  | $[(DKP/-CH)C-H\cdots O=C_{(DKP)}]_2$                             |
|        | $C^2_2(10)$ | $[(Pro-CH)C-H\cdots O=C_{(DKP)}]_2$                              |
| QAXRUT | $C(4)$      | $(DKP-CH)C-H\cdots O=C_{(DKP)}$                                  |
|        | $C(6)$      | $(CH)C-H\cdots O=C_{(DKP)}$                                      |
|        | $C(8)$      | $(CH)C-H\cdots O=C_{(DKP)}$                                      |
|        | $C^2_2(10)$ | $(CH)C-H\cdots O=C_{(DKP)} \& (DKP-CH)C-H\cdots O=C_{(DKP)}$     |
|        | $R^1_2(6)$  | $[(CH)C-H\cdots O=C_{(DKP)}]_2$                                  |
| QOJXIY | $S(6)$      | $(OH)O-H\cdots O=C_{(DKP)}$                                      |
|        | $R^1_2(6)$  | $[(CH)C-H\cdots O=C_{(DKP)}]_2$                                  |
| REFYIK | $C(6)$      | $(Pro-CH)C-H\cdots O=C_{(DKP)}$                                  |
|        | $C(7)$      | $(DKP-CH)C-H\cdots O=C_{(C=O)}$                                  |
|        | $C(9)$      | $(Pro-CH)C-H\cdots O=C_{(DKP)}$                                  |
|        | $C^1_2(8)$  | $(DKP-CH)C-H\cdots O=C_{(C=O)} \& (DKP-CH)C-H\cdots O=C_{(C=O)}$ |
|        | $C^2_2(9)$  | $(CH)C-H\cdots O=C_{(DKP)} \& (CH)C-H\cdots O=C_{(C=O)}$         |
|        | $C^2_2(10)$ | $(CH)C-H\cdots O=C_{(DKP)} \& (DKP-CH)C-H\cdots O=C_{(C=O)}$     |
| RIMTUE | $D(2)$      | $(DKP-NH)N-H\cdots O=C_{(DKP)}$                                  |
|        | $C(5)$      | $(DKP-CH)C-H\cdots O=C_{(DKP)}$                                  |
|        | $R^1_2(6)$  | $[(CH)C-H\cdots O=C_{(DKP)}]_2$                                  |
|        | $R^2_2(8)$  | $[(DKP-NH)N-H\cdots O=C_{(DKP)}]_2$                              |
|        | $D^2_3(8)$  | $(DKP)N-H\cdots O=C_{(DKP)} \& (DKP-CH)C-H\cdots O=C_{(C=O)}$    |
|        | $D^3_3(10)$ | $(NH)N-H\cdots O=C_{(DKP)} \& (DKP-CH)C-H\cdots O=C_{(DKP)}$     |
| RISDIH | $S(6)$      | $(OH)O-H\cdots O=C_{(DKP)}$                                      |
|        | $C(5)$      | $(OH)O-H\cdots O=C_{(DKP)}$                                      |
|        | $C^2_2(10)$ | $(CH)C-H\cdots O-H_{(OH)} \& (CH)C-H\cdots O=C_{(DKP)}$          |
| RIXSIG | $D(2)$      | $(DKP)N-H\cdots O=C_{(DKP)}$                                     |
|        |             | $(Pro-CH)C-H\cdots O=C_{(DKP)}$                                  |
|        | $C(9)$      | $(DKP)N-H\cdots O=C_{(DKP)}$                                     |
|        |             | $(CH)C-H\cdots O=C_{(DKP)}$                                      |
|        | $C^1_2(9)$  | $[(CH)C-H\cdots O=C_{(DKP)}]_2$                                  |
|        | $D^1_2(3)$  | $(DKP-NH)N-H\cdots O=C_{(DKP)} \& (Pro-CH)C-H\cdots O=C_{(DKP)}$ |
|        |             | $(NH)N-H\cdots O=C_{(DKP)} \& (Pro-CH)C-H\cdots O=C_{(DKP)}$     |
|        |             | $(Pro-CH)C-H\cdots C=O_{(DKP)} \& (Pro-CH)C-H\cdots O=C_{(DKP)}$ |
|        | $D^2_2(6)$  | $(Pro/DKP-NH)N-H\cdots O=C_{(DKP)} \& (CH)C-H\cdots O=C_{(DKP)}$ |
|        |             | $(DKP-NH)N-H\cdots O=C_{(DKP)} \& (DKP-CH)C-H\cdots O=C_{(DKP)}$ |
|        |             | $[(Pro-CH)C-H\cdots O=C_{(DKP)}]_2$                              |
|        | $D^2_2(7)$  | $(DKP-NH)N-H\cdots O=C_{(DKP)} \& (Pro-CH)C-H\cdots O=C_{(DKP)}$ |
|        |             | $(DKP-NH)N-H\cdots O=C_{(DKP)} \& (CH)C-H\cdots O=C_{(DKP)}$     |
|        |             | $(Pro-NH)N-H\cdots O=C_{(DKP)} \& (Pro-CH)C-H\cdots O=C_{(DKP)}$ |
|        | $D^2_2(8)$  | $(DKP-NH)N-H\cdots O=C_{(DKP)} \& (Pro-CH)C-H\cdots O=C_{(DKP)}$ |
|        |             | $(Pro-NH)N-H\cdots O=C_{(DKP)} \& (DKP-NH)N-H\cdots O=C_{(DKP)}$ |
|        |             | $[(Pro-CH)C-H\cdots O=C_{(DKP)}]_2$                              |
|        | $D^2_2(9)$  | $(DKP-NH)N-H\cdots O=C_{(DKP)} \& (Pro-CH)C-H\cdots O=C_{(DKP)}$ |
|        | $D^2_2(10)$ | $(Pro-CH)C-H\cdots O=C_{(DKP)} \& (CH)C-H\cdots O=C_{(DKP)}$     |
|        |             | $(Pro-NH)N-H\cdots O=C_{(DKP)} \& (Pro-CH)C-H\cdots O=C_{(DKP)}$ |
|        |             | $(Pro-NH)N-H\cdots O=C_{(DKP)} \& (CH)C-H\cdots O=C_{(DKP)}$     |
|        | $R^1_2(6)$  | $(Pro-NH)N-H\cdots O=C_{(DKP)} \& (CH)C-H\cdots O=C_{(DKP)}$     |
|        | $R^2_2(8)$  | $[(DKP-NH)N-H\cdots O=C_{(DKP)}]_2$                              |
|        | $R^2_2(9)$  | $[(DKP-CH)C-H\cdots O=C_{(DKP)}]_2$                              |
|        | $R^2_2(10)$ | $[(Pro-CH)C-H\cdots O=C_{(DKP)}]_2$                              |
| ROPVOH | $C(4)$      | $(Pro-CH)C-H\cdots O=C_{(DKP)}$                                  |
|        | $C(5)$      | $(Pro-CH)C-H\cdots O=C_{(DKP)}$                                  |
|        | $C(6)$      | $(Pro-CH)C-H\cdots O=C_{(DKP)}$                                  |
|        | $C(9)$      | $(Pro-CH)C-H\cdots O=C_{(DKP)}$                                  |
|        | $C^1_2(5)$  | $[(Pro-CH)C-H\cdots O=C_{(DKP)}]_2$                              |
|        | $C^1_2(6)$  | $[(DKP/Pro-CH)C-H\cdots O=C_{(DKP)}]_2$                          |



|        |               |                                                                                                                                                        |
|--------|---------------|--------------------------------------------------------------------------------------------------------------------------------------------------------|
|        | $C_2^2(9)$    | $(\text{Pro-CH})\text{C-H}\cdots\text{N} \text{ \& } (\text{CH})\text{C-H}\cdots\text{O}=\text{C}_{(\text{DKP})}$                                      |
|        | $C_2^2(10)$   | $(\text{Pro-CH})\text{C-H}\cdots\text{C}=\text{O}_{(\text{DKP})} \text{ \& } (\text{Pro/DKP-CH})\text{C-H}\cdots\text{O}=\text{C}_{(\text{DKP})}$      |
|        |               | $(\text{Pro-CH})\text{C-H}\cdots\text{N} \text{ \& } (\text{Pro-CH})\text{C-H}\cdots\text{O}=\text{C}_{(\text{DKP})}$                                  |
|        | $R_{2(6)}^1$  | $[(\text{Pro-CH})\text{C-H}\cdots\text{O}=\text{C}_{(\text{DKP})}]_2$                                                                                  |
|        | $R_{2(8)}^1$  | $[(\text{CH})\text{C-H}\cdots\text{O}=\text{C}_{(\text{DKP})}]_2$                                                                                      |
|        | $R_{3(10)}^2$ | $[(\text{DKP-CH})\text{C-H}\cdots\text{C}=\text{O}_{(\text{DKP})}]_2 \text{ \& } (\text{Pro-CH})\text{C-H}\cdots\text{O}=\text{C}_{(\text{DKP})}$      |
| TUTSOR | D(2)          | $(\text{CH})\text{C-H}\cdots\text{O}=\text{C}_{(\text{DKP})}$                                                                                          |
|        |               | $(\text{OH})\text{O-H}\cdots\text{O}=\text{C}_{(\text{DKP})}$                                                                                          |
|        | $D_{2(8)}^2$  | $[(\text{CH})\text{C-H}\cdots\text{O}=\text{C}_{(\text{DKP})}]_2$                                                                                      |
|        |               | $(\text{OH})\text{O-H}\cdots\text{O}=\text{C}_{(\text{DKP})} \text{ \& } (\text{CH})\text{C-H}\cdots\text{O}=\text{C}_{(\text{DKP})}$                  |
|        |               | $[(\text{OH})\text{O-H}\cdots\text{O}=\text{C}_{(\text{DKP})}]_2$                                                                                      |
|        | $D_{2(9)}^2$  | $(\text{CH})\text{C-H}\cdots\text{O-H}_{(\text{OH})} \text{ \& } (\text{OH})\text{O-H}\cdots\text{O}=\text{C}_{(\text{DKP})}$                          |
| UCOBEB | $R_{2(7)}^1$  | $(\text{CH})\text{C-H}\cdots\text{C}=\text{O}_{(\text{DKP})} \text{ \& } (\text{OH})\text{O-H}\cdots\text{O}=\text{C}_{(\text{DKP})}$                  |
|        | C(6)          | $(\text{Pro-CH})\text{C-H}\cdots\text{O}=\text{C}_{(\text{DKP})}$                                                                                      |
|        | C(9)          | $(\text{Pro-CH})\text{C-H}\cdots\text{O}=\text{C}_{(\text{DKP})}$                                                                                      |
|        | $C_2^2(10)$   | $(\text{Pro-CH})\text{C-H}\cdots\text{O}=\text{C}_{(\text{DKP})} \text{ \& } (\text{DKP/Pro-CH})\text{C-H}\cdots\text{O}_{(\text{C-O-C})}$             |
|        |               | $(\text{CH})\text{C-H}\cdots\text{O}=\text{C}_{(\text{DKP})} \text{ \& } (\text{DKP/Pro-CH})\text{C-H}\cdots\text{O}_{(\text{C-O-C})}$                 |
| UDALUJ | D(2)          | $(\text{Pro/DKP-CH})\text{C-H}\cdots\text{O}_{(\text{H}_2\text{O})}$                                                                                   |
|        | $D_{2(3)}^1$  | $[(\text{H}_2\text{O})\text{O-H}\cdots\text{O}=\text{C}_{(\text{DKP})}]_2$                                                                             |
|        | $D_{2(4)}^2$  | $(\text{H}_2\text{O})\text{O-H}\cdots\text{O}_{(\text{H}_2\text{O})} \text{ \& } (\text{H}_2\text{O})\text{O-H}\cdots\text{O}=\text{C}_{(\text{DKP})}$ |
|        | $D_{2(6)}^2$  | $(\text{DKP/Pro-CH})\text{C-H}\cdots\text{O}_{(\text{H}_2\text{O})} \text{ \& } (\text{H}_2\text{O})\text{O-H}\cdots\text{O}=\text{C}_{(\text{DKP})}$  |
|        | $D_{2(7)}^2$  | $(\text{DKP/Pro-CH})\text{C-H}\cdots\text{C}=\text{O}_{(\text{DKP})} \text{ \& } (\text{H}_2\text{O})\text{O-H}\cdots\text{O}=\text{C}_{(\text{DKP})}$ |
|        | $D_{2(8)}^2$  | $(\text{Pro-CH})\text{C-H}\cdots\text{O}_{(\text{H}_2\text{O})} \text{ \& } (\text{H}_2\text{O})\text{O-H}\cdots\text{O}=\text{C}_{(\text{DKP})}$      |
|        |               | $[(\text{H}_2\text{O})\text{O-H}\cdots\text{O}=\text{C}_{(\text{DKP})}]_2$                                                                             |
|        | $D_{2(10)}^2$ | $(\text{CH})\text{C-H}\cdots\text{O}_{(\text{H}_2\text{O})} \text{ \& } (\text{H}_2\text{O})\text{O-H}\cdots\text{O}=\text{C}_{(\text{DKP})}$          |
|        | $D_{3(8)}^2$  | $(\text{DKP-NH})\text{N-H}\cdots\text{O}=\text{C}_{(\text{DKP})} \text{ \& } [(\text{H}_2\text{O})\text{O-H}\cdots\text{O}=\text{C}_{(\text{DKP})}]_2$ |
|        |               | $[(\text{H}_2\text{O})\text{O-H}\cdots\text{O}=\text{C}_{(\text{DKP})}]_2 \text{ \& } (\text{DKP-CH})\text{C-H}\cdots\text{O}=\text{C}_{(\text{DKP})}$ |
|        | C(5)          | $(\text{DKP-NH})\text{N-H}\cdots\text{O}=\text{C}_{(\text{DKP})}$                                                                                      |
|        |               | $(\text{DKP-CH})\text{C-H}\cdots\text{O}=\text{C}_{(\text{DKP})}$                                                                                      |
|        | $C_2^2(6)$    | $(\text{DKP/Pro-CH})\text{C-H}\cdots\text{O}_{(\text{H}_2\text{O})} \text{ \& } (\text{H}_2\text{O})\text{O-H}\cdots\text{O}=\text{C}_{(\text{DKP})}$  |
|        | $C_2^2(9)$    | $[(\text{H}_2\text{O})\text{O-H}\cdots\text{O}=\text{C}_{(\text{DKP})}]_2$                                                                             |
|        | $C_2^2(10)$   | $(\text{DKP-NH})\text{N-H}\cdots\text{O}=\text{C}_{(\text{DKP})} \text{ \& } (\text{DKP-CH})\text{C-H}\cdots\text{O}=\text{C}_{(\text{DKP})}$          |
| UKOCON | $R_{2(8)}^2$  | $(\text{DKP-NH})\text{N-H}\cdots\text{O}=\text{C}_{(\text{DKP})} \text{ \& } (\text{DKP-CH})\text{C-H}\cdots\text{O}=\text{C}_{(\text{DKP})}$          |
|        | C(5)          | $(\text{DKP-CH})\text{C-H}\cdots\text{O}=\text{C}_{(\text{DKP})}$                                                                                      |
|        | C(6)          | $(\text{Pro-CH})\text{C-H}\cdots\text{O}=\text{C}_{(\text{DKP})}$                                                                                      |
|        | C(9)          | $(\text{CH})\text{C-H}\cdots\text{O}=\text{C}_{(\text{DKP})}$                                                                                          |
| WAZRAQ | $C_{2(8)}^1$  | $(\text{DKP})\text{C-H}\cdots\text{O}=\text{C}_{(\text{DKP})} \text{ \& } (\text{Pro-CH})\text{C-H}\cdots\text{O}=\text{C}_{(\text{DKP})}$             |
|        | C(6)          | $(\text{DKP-CH})\text{C-H}\cdots\text{H-C}_{(\text{CH-Pro})}$                                                                                          |
|        | C(10)         | $(\text{DKP-CH})\text{C-H}\cdots\text{O}_{(\text{C-O-C})}$                                                                                             |
|        | $C_2^2(10)$   | $(\text{Pro-CH})\text{C-H}\cdots\text{O}=\text{C}_{(\text{DKP})} \text{ \& } (\text{Pro-CH})\text{C-H}\cdots\text{O}_{(\text{C-O-C})}$                 |
|        |               | $(\text{Pro-CH})\text{C-H}\cdots\text{O}=\text{C}_{(\text{DKP})} \text{ \& } (\text{CH})\text{C-H}\cdots\text{O}=\text{C}_{(\text{DKP})}$              |
| XOLQUL | C(5)          | $(\text{Pro-CH})\text{C-H}\cdots\text{O}=\text{C}_{(\text{DKP})}$                                                                                      |
|        | C(6)          | $(\text{Pro-CH})\text{C-H}\cdots\text{O}=\text{C}_{(\text{DKP})}$                                                                                      |
|        | $C_{2(4)}^1$  | $[(\text{Pro})\text{C-H}\cdots\text{O}=\text{C}_{(\text{DKP})}]_2$                                                                                     |
|        | $C_{2(5)}^1$  | $[(\text{Pro})\text{C-H}\cdots\text{O}=\text{C}_{(\text{DKP})}]_2$                                                                                     |
|        | $C_{2(6)}^1$  | $[(\text{CH})\text{C-H}\cdots\text{O}=\text{C}_{(\text{DKP})}]_2$                                                                                      |
|        | $C_{2(7)}^1$  | $[(\text{Pro})\text{C-H}\cdots\text{O}=\text{C}_{(\text{DKP})}]_2$                                                                                     |
|        | $C_{2(8)}^1$  | $[(\text{Pro})\text{C-H}\cdots\text{O}=\text{C}_{(\text{DKP})}]_2$                                                                                     |
|        | $C_{2(9)}^1$  | $[(\text{Pro})\text{C-H}\cdots\text{O}=\text{C}_{(\text{DKP})}]_2$                                                                                     |
|        | $C_{2(10)}^2$ | $[(\text{Pro})\text{C-H}\cdots\text{O}=\text{C}_{(\text{DKP})}]_2$                                                                                     |
|        | $R_{2(5)}^1$  | $[(\text{Pro})\text{C-H}\cdots\text{O}=\$                                                                                                              |
